# Supplementary material for: Resistance Management for Asian Citrus Psyllid, Diaphorina citri Kuwayama, in Florida
Source: Insects. 2017 Sep 20;8(3):103. doi: 10.3390/insects8030103 (PMC5620723; doi:10.3390/insects8030103)
Supplement: Supplementary file 1 [file insects-08-00103-s001.xlsx]

## Sheet: Table 3
Asian citrus psyllid, Diaphorina citri, eggs, nymphs and adults before treatment application
Monitoring initiated date (17 March 2016)																	Mornitoring before application date 19 May 2016
Date	Treatment	Replication	Eggs		Date	Treatment	Replication	Nymphs			Date	Treatment	Replication	Adults			Date	Treatment	Replication	Eggs			Date	Treatment	Replication	Nymphs			Date	Treatment	Replication	Adults
17M	A	1	0		17M	A	1	0			17M	A	1	0			19MA	A	1	0			19MA	A	1	0			19MA	A	1	0
17M	A	1	0		17M	A	1	0			17M	A	1	0			19MA	A	1	1			19MA	A	1	1			19MA	A	1	4
17M	A	1	0		17M	A	1	0			17M	A	1	0			19MA	A	1	0			19MA	A	1	1			19MA	A	1	3
17M	A	1	0		17M	A	1	0			17M	A	1	0			19MA	A	1	0			19MA	A	1	1			19MA	A	1	4
17M	A	1	0		17M	A	1	0			17M	A	1	0			19MA	A	1	1			19MA	A	1	3			19MA	A	1	3
17M	A	1	0		17M	A	1	0			17M	A	1	0			19MA	A	1	3			19MA	A	1	3			19MA	A	1	1
17M	A	1	0		17M	A	1	0			17M	A	1	0			19MA	A	1	1			19MA	A	1	1			19MA	A	1	0
17M	A	1	0		17M	A	1	0			17M	A	1	0			19MA	A	1	2			19MA	A	1	2			19MA	A	1	0
17M	A	1	0		17M	A	1	0			17M	A	1	0			19MA	A	1	0			19MA	A	1	1			19MA	A	1	0
17M	A	1	2		17M	A	1	0			17M	A	1	0			19MA	A	1	0			19MA	A	1	2			19MA	A	1	2
17M	A	2	0		17M	A	2	0			17M	A	2	0			19MA	A	2	2			19MA	A	2	2			19MA	A	2	0
17M	A	2	0		17M	A	2	0			17M	A	2	0			19MA	A	2	2			19MA	A	2	1			19MA	A	2	0
17M	A	2	0		17M	A	2	0			17M	A	2	0			19MA	A	2	2			19MA	A	2	1			19MA	A	2	0
17M	A	2	0		17M	A	2	0			17M	A	2	0			19MA	A	2	1			19MA	A	2	3			19MA	A	2	6
17M	A	2	0		17M	A	2	0			17M	A	2	0			19MA	A	2	3			19MA	A	2	2			19MA	A	2	5
17M	A	2	0		17M	A	2	0			17M	A	2	0			19MA	A	2	2			19MA	A	2	2			19MA	A	2	1
17M	A	2	0		17M	A	2	0			17M	A	2	0			19MA	A	2	1			19MA	A	2	3			19MA	A	2	4
17M	A	2	0		17M	A	2	0			17M	A	2	0			19MA	A	2	1			19MA	A	2	2			19MA	A	2	1
17M	A	2	0		17M	A	2	0			17M	A	2	0			19MA	A	2	1			19MA	A	2	3			19MA	A	2	2
17M	A	2	0		17M	A	2	0			17M	A	2	0			19MA	A	2	0			19MA	A	2	3			19MA	A	2	0
17M	A	3	0		17M	A	3	0			17M	A	3	0			19MA	A	3	0			19MA	A	3	1			19MA	A	3	2
17M	A	3	0		17M	A	3	0			17M	A	3	0			19MA	B	1	1			19MA	B	1	3			19MA	A	3	0
17M	A	3	0		17M	A	3	0			17M	A	3	0			19MA	B	1	2			19MA	B	1	3			19MA	A	3	0
17M	A	3	0		17M	A	3	0			17M	A	3	0			19MA	B	1	1			19MA	B	1	3			19MA	A	3	0
17M	A	3	0		17M	A	3	0			17M	A	3	0			19MA	B	1	2			19MA	B	1	3			19MA	A	3	0
17M	A	3	0		17M	A	3	0			17M	A	3	0			19MA	B	1	0			19MA	B	1	3			19MA	A	3	3
17M	A	3	0		17M	A	3	0			17M	A	3	0			19MA	B	1	2			19MA	B	1	2			19MA	A	3	1
17M	A	3	0		17M	A	3	0			17M	A	3	0			19MA	B	1	1			19MA	B	1	3			19MA	A	3	4
17M	A	3	0		17M	A	3	0			17M	A	3	0			19MA	B	1	2			19MA	B	1	3			19MA	A	3	3
17M	A	3	0		17M	A	3	0			17M	A	3	0			19MA	B	1	2			19MA	B	1	1			19MA	A	3	0
17M	A	4	0		17M	A	4	1			17M	A	4	0			19MA	B	1	1			19MA	B	1	1			19MA	A	4	3
17M	A	4	0		17M	A	4	0			17M	A	4	0			19MA	B	2	2			19MA	B	2	3			19MA	A	4	0
17M	A	4	0		17M	A	4	0			17M	A	4	0			19MA	B	2	2			19MA	B	2	3			19MA	A	4	0
17M	A	4	0		17M	A	4	0			17M	A	4	0			19MA	B	2	1			19MA	B	2	3			19MA	A	4	2
17M	A	4	0		17M	A	4	0			17M	A	4	0			19MA	B	2	2			19MA	B	2	3			19MA	A	4	2
17M	A	4	0		17M	A	4	0			17M	A	4	0			19MA	B	2	2			19MA	B	2	3			19MA	A	4	2
17M	A	4	0		17M	A	4	0			17M	A	4	0			19MA	B	2	2			19MA	B	2	3			19MA	A	4	0
17M	A	4	0		17M	A	4	0			17M	A	4	0			19MA	B	2	0			19MA	B	2	2			19MA	A	4	0
17M	A	4	0		17M	A	4	0			17M	A	4	0			19MA	B	2	0			19MA	B	2	2			19MA	A	4	0
17M	A	4	0		17M	A	4	0			17M	A	4	0			19MA	B	2	2			19MA	B	2	3			19MA	A	4	2
17M	B	1	0		17M	B	1	1			17M	B	1	0			19MA	B	2	1			19MA	B	2	1			19MA	B	1	0
17M	B	1	0		17M	B	1	0			17M	B	1	0			19MA	B	3	2			19MA	B	3	3			19MA	B	1	0
17M	B	1	0		17M	B	1	0			17M	B	1	0			19MA	B	3	0			19MA	B	3	0			19MA	B	1	4
17M	B	1	0		17M	B	1	0			17M	B	1	0			19MA	B	3	1			19MA	B	3	3			19MA	B	1	2
17M	B	1	0		17M	B	1	0			17M	B	1	0			19MA	B	3	1			19MA	B	3	3			19MA	B	1	3
17M	B	1	1		17M	B	1	1			17M	B	1	1			19MA	B	3	3			19MA	B	3	2			19MA	B	1	2
17M	B	1	0		17M	B	1	0			17M	B	1	0			19MA	B	3	1			19MA	B	3	3			19MA	B	1	0
17M	B	1	0		17M	B	1	0			17M	B	1	1			19MA	B	3	3			19MA	B	3	1			19MA	B	1	0
17M	B	1	0		17M	B	1	0			17M	B	1	0			19MA	B	3	1			19MA	B	3	2			19MA	B	1	0
17M	B	1	0		17M	B	1	0			17M	B	1	0			19MA	UT	1	0			19MA	UT	1	0			19MA	B	1	2
17M	B	2	1		17M	B	2	1			17M	B	2	0			19MA	UT	1	0			19MA	UT	1	0			19MA	B	2	1
17M	B	2	0		17M	B	2	0			17M	B	2	0			19MA	UT	1	0			19MA	UT	1	1			19MA	B	2	0
17M	B	2	0		17M	B	2	1			17M	B	2	0			19MA	UT	1	0			19MA	UT	1	0			19MA	B	2	0
17M	B	2	0		17M	B	2	1			17M	B	2	0			19MA	UT	1	0			19MA	UT	1	0			19MA	B	2	2
17M	B	2	0		17M	B	2	1			17M	B	2	0			19MA	UT	1	0			19MA	UT	1	0			19MA	B	2	4
17M	B	2	0		17M	B	2	0			17M	B	2	0			19MA	UT	1	0			19MA	UT	1	0			19MA	B	2	1
17M	B	2	1		17M	B	2	1			17M	B	2	0			19MA	UT	1	0			19MA	UT	1	0			19MA	B	2	7
17M	B	2	0		17M	B	2	1			17M	B	2	0			19MA	UT	1	0			19MA	UT	1	0			19MA	B	2	1
17M	B	2	0		17M	B	2	0			17M	B	2	0			19MA	UT	1	2			19MA	UT	1	2			19MA	B	2	0
17M	B	2	0		17M	B	2	0			17M	B	2	0			19MA	UT	2	0			19MA	UT	2	2			19MA	B	2	0
17M	B	3	0		17M	B	3	1			17M	B	3	0			19MA	UT	2	2			19MA	UT	2	3			19MA	B	3	0
17M	B	3	0		17M	B	3	0			17M	B	3	0			19MA	UT	2	3			19MA	UT	2	3			19MA	B	3	3
17M	B	3	0		17M	B	3	0			17M	B	3	0			19MA	UT	2	3			19MA	UT	2	3			19MA	B	3	0
17M	B	3	0		17M	B	3	0			17M	B	3	0			19MA	UT	2	3			19MA	UT	2	3			19MA	B	3	0
17M	B	3	0		17M	B	3	0			17M	B	3	0			19MA	UT	2	3			19MA	UT	2	3			19MA	B	3	0
17M	B	3	0		17M	B	3	0			17M	B	3	0			19MA	UT	2	2			19MA	UT	2	3			19MA	B	3	0
17M	B	3	0		17M	B	3	0			17M	B	3	0			19MA	UT	2	2			19MA	UT	2	2			19MA	B	3	0
17M	B	3	0		17M	B	3	0			17M	B	3	0			19MA	UT	2	3			19MA	UT	2	2			19MA	B	3	0
17M	B	3	0		17M	B	3	1			17M	B	3	0			19MA	UT	2	0			19MA	UT	2	1			19MA	B	3	0
17M	B	3	0		17M	B	3	0			17M	B	3	0			19MA	UT	3	3			19MA	UT	3	1			19MA	B	3	0
17M	B	4	0		17M	B	4	0			17M	B	4	0			19MA	UT	3	0			19MA	UT	3	0			19MA	B	4	0
17M	B	4	0		17M	B	4	0			17M	B	4	0			19MA	UT	3	0			19MA	UT	3	0			19MA	B	4	4
17M	B	4	0		17M	B	4	0			17M	B	4	0			19MA	UT	4	2			19MA	UT	4	3			19MA	B	4	5
17M	B	4	0		17M	B	4	0			17M	B	4	0			19MA	UT	4	0			19MA	UT	4	1			19MA	B	4	1
17M	B	4	0		17M	B	4	0			17M	B	4	0			19MA	UT	4	1			19MA	UT	4	3			19MA	B	4	0
17M	B	4	0		17M	B	4	0			17M	B	4	0			19MA	UT	4	1			19MA	UT	4	3			19MA	B	4	0
17M	B	4	0		17M	B	4	0			17M	B	4	0			19MA	UT	4	1			19MA	UT	4	3			19MA	B	4	1
17M	B	4	0		17M	B	4	0			17M	B	4	0			19MA	UT	4	0			19MA	UT	4	1			19MA	B	4	4
17M	B	4	0		17M	B	4	0			17M	B	4	0			19MA	UT	4	1			19MA	UT	4	1			19MA	B	4	0
17M	B	4	0		17M	B	4				17M	B	4	0			19MA	UT	4	1			19MA	UT	4	3			19MA	B	4	0
17M	UT	1	0		17M	UT	1	1			17M	C	1	0			19MA	UT	4	1			19MA	UT	4	3			19MA	C	1	0
17M	UT	1	0		17M	UT	1	1			17M	C	1	0			19MA	UT	4	1			19MA	UT	4	3			19MA	C	1	3
17M	UT	1	0		17M	UT	1	1			17M	C	1	0			19MA	C	1	3			19MA	C	1	3			19MA	C	1	1
17M	UT	1	0		17M	UT	1	1			17M	C	1	0			19MA	C	1	2			19MA	C	1	3			19MA	C	1	1
17M	UT	1	0		17M	UT	1	0			17M	C	1	0			19MA	C	1	1			19MA	C	1	3			19MA	C	1	0
17M	UT	1	0		17M	UT	1	0			17M	C	1	0			19MA	C	1	1			19MA	C	1	3			19MA	C	1	2
17M	UT	1	0		17M	UT	1	0			17M	C	1	0			19MA	C	1	3			19MA	C	1	3			19MA	C	1	2
17M	UT	1	0		17M	UT	1	0			17M	C	1	0			19MA	C	1	2			19MA	C	1	3			19MA	C	1	3
17M	UT	1	0		17M	UT	1	0			17M	C	1	0			19MA	C	1	1			19MA	C	1	3			19MA	C	1	0
17M	UT	1	0		17M	UT	1	0			17M	C	1	0			19MA	C	1	0			19MA	C	1	3			19MA	C	1	0
17M	UT	2	0		17M	UT	2	0			17M	C	2	0			19MA	C	1	1			19MA	C	1	1			19MA	C	2	1
17M	UT	2	0		17M	UT	2	0			17M	C	2	0			19MA	C	1	1			19MA	C	1	3			19MA	C	2	0
17M	UT	2	0		17M	UT	2	0			17M	C	2	0			19MA	C	2	0			19MA	C	2	1			19MA	C	2	2
17M	UT	2	0		17M	UT	2	0			17M	C	2	0			19MA	C	2	2			19MA	C	2	3			19MA	C	2	1
17M	UT	2	0		17M	UT	2	0			17M	C	2	0			19MA	C	2	1			19MA	C	2	1			19MA	C	2	2
17M	UT	2	0		17M	UT	2	0			17M	C	2	0			19MA	C	2	2			19MA	C	2	2			19MA	C	2	3
17M	UT	2	0		17M	UT	2	0			17M	C	2	0			19MA	C	3	3			19MA	C	3	2			19MA	C	2	1
17M	UT	2	0		17M	UT	2	0			17M	C	2	0			19MA	C	3	3			19MA	C	3	3			19MA	C	2	0
17M	UT	2	0		17M	UT	2	0			17M	C	2	0			19MA	C	3	1			19MA	C	3	1			19MA	C	2	0
17M	UT	2	0		17M	UT	2	0			17M	C	2	0			19MA	C	3	1			19MA	C	3	3			19MA	C	2	0
17M	UT	3	0		17M	UT	3	2			17M	C	3	0			19MA	C	3	1			19MA	C	3	2			19MA	C	3	0
17M	UT	3	0		17M	UT	3	2			17M	C	3	0			19MA	C	3	0			19MA	C	3	2			19MA	C	3	1
17M	UT	3	1		17M	UT	3	2			17M	C	3	0			19MA	C	3	3			19MA	C	3	3			19MA	C	3	0
17M	UT	3	1		17M	UT	3	1			17M	C	3	0			19MA	C	3	0			19MA	C	3	3			19MA	C	3	0
17M	UT	3	0		17M	UT	3	2			17M	C	3	0			19MA	C	3	1			19MA	C	3	2			19MA	C	3	0
17M	UT	3	0		17M	UT	3	1			17M	C	3	0			19MA	C	3	0			19MA	C	3	3			19MA	C	3	1
17M	UT	3	1		17M	UT	3	0			17M	C	3	0			19MA	C	4	1			19MA	C	4	3			19MA	C	3	1
17M	UT	3	0		17M	UT	3	1			17M	C	3	0			19MA	C	4	3			19MA	C	4	2			19MA	C	3	2
17M	UT	3	6		17M	UT	3	1			17M	C	3	0			19MA	C	4	2			19MA	C	4	3			19MA	C	3	0
17M	UT	3	1		17M	UT	3	0			17M	C	3	0			19MA	C	4	1			19MA	C	4	3			19MA	C	3	0
17M	UT	4	0		17M	UT	4	1			17M	C	4	0			19MA	C	4	1			19MA	C	4	0			19MA	C	4	1
17M	UT	4	1		17M	UT	4	1			17M	C	4	1			19MA	C	4	0			19MA	C	4	0			19MA	C	4	1
17M	UT	4	0		17M	UT	4	3			17M	C	4	0			19MA	C	4	0			19MA	C	4	0			19MA	C	4	0
17M	UT	4	0		17M	UT	4	2			17M	C	4	0			19MA	C	4	1			19MA	C	4	3			19MA	C	4	5
17M	UT	4	0		17M	UT	4	1			17M	C	4	0			19MA	C	4	0			19MA	C	4	0			19MA	C	4	2
17M	UT	4	0		17M	UT	4	1			17M	C	4	1			19MA	C	4	0			19MA	C	4	0			19MA	C	4	1
17M	UT	4	0		17M	UT	4	1			17M	C	4	1			19MA	T	1	2			19MA	T	1	3			19MA	C	4
17M	UT	4	0		17M	UT	4	1			17M	C	4	0			19MA	T	1	0			19MA	T	1	1			19MA	UT	1	0
17M	UT	4	0		17M	UT	4	0			17M	C	4	0			19MA	T	1	3			19MA	T	1	3			19MA	UT	1	1
17M	UT	4	0		17M	UT	4	0			17M	C	4	0			19MA	T	1	3			19MA	T	1	2			19MA	UT	1	4
17M	C	1	0		17M	C	1	0			17M	T	1	0			19MA	T	1	3			19MA	T	1	2			19MA	UT	1	5
17M	C	1	0		17M	C	1	0			17M	T	1	0			19MA	T	1	0			19MA	T	1	2			19MA	UT	1	1
17M	C	1	0		17M	C	1	0			17M	T	1	0			19MA	T	1	1			19MA	T	1	3			19MA	UT	1	2
17M	C	1	0		17M	C	1	0			17M	T	1	0			19MA	T	1	3			19MA	T	1	2			19MA	UT	1	4
17M	C	1	1		17M	C	1	3			17M	T	1	0			19MA	T	1	3			19MA	T	1	3			19MA	UT	1	3
17M	C	1	0		17M	C	1	0			17M	T	1	0			19MA	T	1	3			19MA	T	1	3			19MA	UT	1	0
17M	C	1	0		17M	C	1	1			17M	T	1	0			19MA	T	2	0			19MA	T	2	3			19MA	UT	1	0
17M	C	1	1		17M	C	1	1			17M	T	1	0			19MA	T	2	1			19MA	T	2	3			19MA	UT	2	2
17M	C	1	0		17M	C	1	0			17M	T	1	0			19MA	T	2	0			19MA	T	2	1			19MA	UT	2	1
17M	C	1	0		17M	C	1	1			17M	T	1	0			19MA	T	2	3			19MA	T	2	3			19MA	UT	2	1
17M	C	2	0		17M	C	2	0			17M	T	2	0			19MA	T	2	1			19MA	T	2	2			19MA	UT	2	2
17M	C	2	0		17M	C	2	0			17M	T	2	0			19MA	T	2	3			19MA	T	2	3			19MA	UT	2	0
17M	C	2	0		17M	C	2	0			17M	T	2	0			19MA	T	2	2			19MA	T	2	1			19MA	UT	2	0
17M	C	2	0		17M	C	2	0			17M	T	2	0			19MA	T	2	1			19MA	T	2	3			19MA	UT	2	0
17M	C	2	0		17M	C	2	0			17M	T	2	0			19MA	T	2	2			19MA	T	2	3			19MA	UT	2	0
17M	C	2	0		17M	C	2	0			17M	T	2	0			19MA	T	2	2			19MA	T	2	2			19MA	UT	2	0
17M	C	2	0		17M	C	2	0			17M	T	2	0			19MA	T	3	0			19MA	T	3	3			19MA	UT	2	0
17M	C	2	0		17M	C	2	0			17M	T	2	0			19MA	T	3	2			19MA	T	3	3			19MA	UT	3	5
17M	C	2	0		17M	C	2	0			17M	T	2	0			19MA	T	3	0			19MA	T	3	1			19MA	UT	3	0
17M	C	2	0		17M	C	2	0			17M	T	2	2			19MA	T	3	1			19MA	T	3	3			19MA	UT	3	6
17M	C	3	0		17M	C	3	0			17M	T	3	0			19MA	T	3	3			19MA	T	3	3			19MA	UT	3	3
17M	C	3	0		17M	C	3	1			17M	T	3	0			19MA	T	3	2			19MA	T	3	3			19MA	UT	3	5
17M	C	3	0		17M	C	3	0			17M	T	3	0			19MA	T	3	3			19MA	T	3	3			19MA	UT	3	3
17M	C	3	0		17M	C	3	0			17M	T	3	0			19MA	T	3	0			19MA	T	3	3			19MA	UT	3	3
17M	C	3	0		17M	C	3	1			17M	T	3	0			19MA	T	3	3			19MA	T	3	0			19MA	UT	3	1
17M	C	3	0		17M	C	3	0			17M	T	3	0			19MA	T	4	2			19MA	T	4	3			19MA	UT	3	4
17M	C	3	0		17M	C	3	0			17M	T	3	0			19MA	T	4	2			19MA	T	4	3			19MA	UT	3	0
17M	C	3	0		17M	C	3	0			17M	T	3	0			19MA	T	4	0			19MA	T	4	3			19MA	UT	4	0
17M	C	3	0		17M	C	3	0			17M	T	3	0			19MA	T	4	3			19MA	T	4	3			19MA	UT	4	3
17M	C	3	0		17M	C	3	1			17M	T	3	0			19MA	T	4	2			19MA	T	4	2			19MA	UT	4	0
17M	C	4	0		17M	C	4	1			17M	T	4	0			19MA	T	4	1			19MA	T	4	3			19MA	UT	4	4
17M	C	4	0		17M	C	4	0			17M	T	4	0			19MA	T	4	1			19MA	T	4	3			19MA	UT	4	0
17M	C	4	0		17M	C	4	0			17M	T	4	0			19MA	T	4	1			19MA	T	4	3			19MA	UT	4	0
17M	C	4	0		17M	C	4	0			17M	T	4	0			19MA	T	4	2			19MA	T	4	3			19MA	UT	4	0
17M	C	4	0		17M	C	4	0			17M	T	4	0			19MA	T	4	2			19MA	T	4	2			19MA	UT	4	0
17M	C	4	1		17M	C	4	0			17M	T	4	0															19MA	UT	4	1
17M	C	4	0		17M	C	4	0			17M	T	4	0															19MA	UT	4	0
17M	C	4	0		17M	C	4	1			17M	T	4	0															19MA	T	1	2
17M	C	4	1		17M	C	4	2			17M	T	4	0															19MA	T	1	0
17M	C	4			17M	C	4				17M	T	4	0															19MA	T	1	8
17M	T	1	0		17M	T	1	0			17M	UT	1	0															19MA	T	1	3
17M	T	1	1		17M	T	1	1			17M	UT	1	0															19MA	T	1	3
17M	T	1	0		17M	T	1	1			17M	UT	1	0															19MA	T	1	5
17M	T	1	0		17M	T	1	0			17M	UT	1	0															19MA	T	1	2
17M	T	1	0		17M	T	1	0			17M	UT	1	0															19MA	T	1	0
17M	T	1	0		17M	T	1	0			17M	UT	1	0															19MA	T	1	0
17M	T	1	0		17M	T	1	0			17M	UT	1	0															19MA	T	1	0
17M	T	1	0		17M	T	1	0			17M	UT	1	0															19MA	T	2	4
17M	T	1	0		17M	T	1	0			17M	UT	1	0															19MA	T	2	0
17M	T	1	0		17M	T	1	0			17M	UT	1	0															19MA	T	2	4
17M	T	2	0		17M	T	2	0			17M	UT	2	0															19MA	T	2	0
17M	T	2	0		17M	T	2	0			17M	UT	2	0															19MA	T	2	2
17M	T	2	0		17M	T	2	0			17M	UT	2	0															19MA	T	2	0
17M	T	2	0		17M	T	2	0			17M	UT	2	0															19MA	T	2	0
17M	T	2	0		17M	T	2	0			17M	UT	2	0															19MA	T	2	1
17M	T	2	0		17M	T	2	0			17M	UT	2	0															19MA	T	2	0
17M	T	2	0		17M	T	2	0			17M	UT	2	0															19MA	T	2	0
17M	T	2	0		17M	T	2	0			17M	UT	2	0															19MA	T	3	1
17M	T	2	0		17M	T	2	0			17M	UT	2	0															19MA	T	3	0
17M	T	2	0		17M	T	2	0			17M	UT	2	0															19MA	T	3	0
17M	T	3	0		17M	T	3	0			17M	UT	3	0															19MA	T	3	1
17M	T	3	0		17M	T	3	0			17M	UT	3	0															19MA	T	3	0
17M	T	3	0		17M	T	3	0			17M	UT	3	0															19MA	T	3	2
17M	T	3	0		17M	T	3	1			17M	UT	3	0															19MA	T	3	4
17M	T	3	0		17M	T	3	0			17M	UT	3	0															19MA	T	3	0
17M	T	3	0		17M	T	3	0			17M	UT	3	0															19MA	T	3	2
17M	T	3	0		17M	T	3	0			17M	UT	3	0															19MA	T	3	0
17M	T	3	0		17M	T	3	0			17M	UT	3	0															19MA	T	4	0
17M	T	3	0		17M	T	3	1			17M	UT	3	0															19MA	T	4	0
17M	T	3	0		17M	T	4	0			17M	UT	3	0															19MA	T	4	1
17M	T	4	0		17M	T	4	0			17M	UT	4	0															19MA	T	4	2
17M	T	4	0		17M	T	4	0			17M	UT	4	0															19MA	T	4	2
17M	T	4	0		17M	T	4	0			17M	UT	4	0															19MA	T	4	0
17M	T	4	0		17M	T	4	0			17M	UT	4	0															19MA	T	4	1
17M	T	4	0		17M	T	4	0			17M	UT	4	0															19MA	T	4	0
17M	T	4	0		17M	T	4	0			17M	UT	4	0															19MA	T	4	0
17M	T	4	0		17M	T	4	0			17M	UT	4	0															19MA	T	4	0
17M	T	4	0		17M	T	4	0			17M	UT	4	0
17M	T	4	0		17M	T	4	0			17M	UT	4	0
17M	T	4	0								17M	UT	4	0

## Sheet: Table 4 
Asian citrus psyllid, Diaphorina citri, eggs, nymphs and adults during rotation treatments (May 31, 2016 to October 26, 2016)
Date	Treatment	Replication	Adults		Date	Treatment	Repplication	Eggs		Date	Treatment	Replication	nymph
31MA	A	1	0		31MA	A	1	0		31M	A	1	0
31MA	A	1	0		31MA	A	1	0		31M	A	1	2
31MA	A	1	0		31MA	A	1	0		31M	A	1	1
31MA	A	1	0		31MA	A	1	0		31M	A	1	1
31MA	A	1	0		31MA	A	1	0		31M	A	1	1
31MA	A	1	0		31MA	A	1	0		31M	A	1	0
31MA	A	1	0		31MA	A	1	0		31M	A	1	1
31MA	A	1	0		31MA	A	1	0		31M	A	1	2
31MA	A	1	0		31MA	A	1	0		31M	A	1	0
31MA	A	1	0		31MA	A	1	0		31M	A	1	0
31MA	A	2	0		31MA	A	2	0		31M	A	2	0
31MA	A	2	0		31MA	A	2	0		31M	A	2	0
31MA	A	2	0		31MA	A	2	0		31M	A	2	0
31MA	A	2	0		31MA	A	2	0		31M	A	2	0
31MA	A	2	0		31MA	A	2	0		31M	A	2	0
31MA	A	2	0		31MA	A	2	0		31M	A	2	0
31MA	A	2	0		31MA	A	2	0		31M	A	2	0
31MA	A	2	0		31MA	A	2	0		31M	A	2	0
31MA	A	2	0		31MA	A	2	0		31M	A	2	0
31MA	A	2	0		31MA	A	2	0		31M	A	3	1
31MA	A	3	0		31MA	A	3	0		31M	A	3	0
31MA	A	3	0		31MA	A	3	0		31M	A	3	1
31MA	A	3	0		31MA	A	3	0		31M	A	3	0
31MA	A	3	0		31MA	A	3	0		31M	A	3	0
31MA	A	3	0		31MA	A	3	0		31M	A	3	2
31MA	A	3	0		31MA	A	3	0		31M	A	3	1
31MA	A	3	0		31MA	A	3	0		31M	A	3	0
31MA	A	3	0		31MA	A	3	0		31M	A	3	0
31MA	A	3	0		31MA	A	3	0		31M	A	3	0
31MA	A	3	0		31MA	A	3	0		31M	A	4	1
31MA	A	4	1		31MA	A	4	3		31M	A	4	0
31MA	A	4	1		31MA	A	4	1		31M	A	4	3
31MA	A	4	0		31MA	A	4	1		31M	A	4	0
31MA	A	4	0		31MA	A	4	1		31M	A	4	0
31MA	A	4	0		31MA	A	4	0		31M	A	4	1
31MA	A	4	0		31MA	A	4	3		31M	A	4	2
31MA	A	4	0		31MA	A	4	1		31M	A	4	0
31MA	A	4	0		31MA	A	4	1		31M	A	4	0
31MA	A	4	0		31MA	A	4	3		31M	A	4	1
31MA	A	4	0		31MA	A	4	1		31M	B	1	1
31MA	B	1	0		31MA	B	1	0		31M	B	1	2
31MA	B	1	0		31MA	B	1	0		31M	B	1	1
31MA	B	1	0		31MA	B	1	0		31M	B	1	2
31MA	B	1	0		31MA	B	1	0		31M	B	1	1
31MA	B	1	0		31MA	B	1	0		31M	B	1	1
31MA	B	1	0		31MA	B	1	0		31M	B	1	0
31MA	B	1	0		31MA	B	1	0		31M	B	1	1
31MA	B	1	0		31MA	B	1	1		31M	B	1	1
31MA	B	1	0		31MA	B	1	0		31M	B	1	0
31MA	B	1	0		31MA	B	1	0		31M	B	2	1
31MA	B	2	0		31MA	B	2	0		31M	B	2	2
31MA	B	2	0		31MA	B	2	0		31M	B	2	1
31MA	B	2	0		31MA	B	2	0		31M	B	2	1
31MA	B	2	0		31MA	B	2	0		31M	B	2	1
31MA	B	2	0		31MA	B	2	0		31M	B	2	0
31MA	B	2	0		31MA	B	2	2		31M	B	2	1
31MA	B	2	0		31MA	B	2	1		31M	B	2	1
31MA	B	2	0		31MA	B	2	0		31M	B	2	0
31MA	B	2	0		31MA	B	2	0		31M	B	2	1
31MA	B	2	0		31MA	B	2	0		31M	B	3	1
31MA	B	3	1		31MA	B	3	0		31M	B	3	1
31MA	B	3	1		31MA	B	3	0		31M	B	3	0
31MA	B	3	0		31MA	B	3	0		31M	B	3	1
31MA	B	3	0		31MA	B	3	0		31M	B	3	0
31MA	B	3	0		31MA	B	3	0		31M	B	3	0
31MA	B	3	0		31MA	B	3	0		31M	B	3	0
31MA	B	3	0		31MA	B	3	0		31M	B	3	0
31MA	B	3	0		31MA	B	3	0		31M	B	3	1
31MA	B	3	0		31MA	B	3	0		31M	B	3	0
31MA	B	3	0		31MA	B	3	0		31M	B	4	3
31MA	B	4	1		31MA	B	4	1		31M	B	4	3
31MA	B	4	0		31MA	B	4	1		31M	B	4	2
31MA	B	4	0		31MA	B	4	1		31M	B	4	2
31MA	B	4	0		31MA	B	4	2		31M	B	4	1
31MA	B	4	0		31MA	B	4	1		31M	B	4	1
31MA	B	4	0		31MA	B	4	0		31M	B	4	1
31MA	B	4	0		31MA	B	4	1		31M	B	4	0
31MA	B	4	0		31MA	B	4	1		31M	B	4	1
31MA	B	4	0		31MA	B	4	1		31M	B	4	1
31MA	B	4	0		31MA	B	4	3		31M	UT	1	0
31MA	UT	1	0		31MA	UT	1	0		31M	UT	1	3
31MA	UT	1	0		31MA	UT	1	0		31M	UT	1	0
31MA	UT	1	1		31MA	UT	1	0		31M	UT	1	2
31MA	UT	1	1		31MA	UT	1	2		31M	UT	1	0
31MA	UT	2	1		31MA	UT	1	2		31M	UT	1	3
31MA	UT	2	0		31MA	UT	1	1		31M	UT	1	2
31MA	UT	2	0		31MA	UT	1	0		31M	UT	1	1
31MA	UT	2	1		31MA	UT	1	1		31M	UT	1	2
31MA	UT	2	0		31MA	UT	1	1		31M	UT	1	1
31MA	UT	2	0		31MA	UT	1	0		31M	UT	2	1
31MA	UT	2	0		31MA	UT	2	0		31M	UT	2	1
31MA	UT	3	0		31MA	UT	2	0		31M	UT	2	1
31MA	UT	3	1		31MA	UT	2	1		31M	UT	2	0
31MA	UT	3	0		31MA	UT	2	1		31M	UT	2	0
31MA	UT	3	1		31MA	UT	2	0		31M	UT	2	3
31MA	UT	3	0		31MA	UT	2	0		31M	UT	2	1
31MA	UT	3	0		31MA	UT	2	0		31M	UT	2	0
31MA	UT	3	0		31MA	UT	2	1		31M	UT	2	0
31MA	UT	3	0		31MA	UT	2	1		31M	UT	2	0
31MA	UT	3	0		31MA	UT	2	2		31M	UT	3	0
31MA	UT	3	0		31MA	UT	3	1		31M	UT	3	0
31MA	UT	4	1		31MA	UT	3	3		31M	UT	3	3
31MA	UT	4	1		31MA	UT	3	2		31M	UT	3	2
31MA	UT	4	1		31MA	UT	3	1		31M	UT	3	3
31MA	UT	4	1		31MA	UT	3	1		31M	UT	3	2
31MA	UT	4	0		31MA	UT	3	0		31M	UT	3	2
31MA	C	1	0		31MA	UT	3	0		31M	UT	3	1
31MA	C	1	0		31MA	UT	3	0		31M	UT	3	0
31MA	C	1	0		31MA	UT	3	0		31M	UT	3	1
31MA	C	1	0		31MA	UT	3	0		31M	UT	4	1
31MA	C	1	0		31MA	UT	4	2		31M	UT	4	0
31MA	C	1	0		31MA	UT	4	3		31M	UT	4	1
31MA	C	1	0		31MA	UT	4	3		31M	UT	4	1
31MA	C	1	0		31MA	UT	4	3		31M	UT	4	2
31MA	C	1	0		31MA	UT	4	3		31M	UT	4	2
31MA	C	1	0		31MA	UT	4	3		31M	UT	4	1
31MA	C	2	1		31MA	UT	4	3		31M	UT	4	1
31MA	C	2	0		31MA	UT	4	2		31M	UT	4	1
31MA	C	2	0		31MA	UT	4	3		31M	UT	4	1
31MA	C	2	0		31MA	UT	4	3		31M	C	1	3
31MA	C	2	0		31MA	C	1	0		31M	C	1	1
31MA	C	2	0		31MA	C	1	0		31M	C	1	2
31MA	C	2	0		31MA	C	1	0		31M	C	1	3
31MA	C	2	0		31MA	C	1	0		31M	C	1	2
31MA	C	2	0		31MA	C	1	0		31M	C	1	3
31MA	C	2	0		31MA	C	1	0		31M	C	1	3
31MA	C	3	0		31MA	C	1	0		31M	C	1	1
31MA	C	3	0		31MA	C	1	0		31M	C	1	2
31MA	C	3	0		31MA	C	1	0		31M	C	1	3
31MA	C	3	0		31MA	C	1	0		31M	C	2	0
31MA	C	3	0		31MA	C	2	0		31M	C	2	1
31MA	C	3	0		31MA	C	2	0		31M	C	2	0
31MA	C	3	0		31MA	C	2	0		31M	C	2	1
31MA	C	3	0		31MA	C	2	0		31M	C	2	0
31MA	C	3	0		31MA	C	2	0		31M	C	2	2
31MA	C	3	0		31MA	C	2	0		31M	C	2	0
31MA	C	4	0		31MA	C	2	0		31M	C	2	2
31MA	C	4	0		31MA	C	2	0		31M	C	2	0
31MA	C	4	0		31MA	C	2	0		31M	C	2	2
31MA	C	4	0		31MA	C	2	0		31M	C	3	0
31MA	C	4	0		31MA	C	3	1		31M	C	3	1
31MA	C	4	0		31MA	C	3	0		31M	C	3	2
31MA	C	4	0		31MA	C	3	0		31M	C	3	3
31MA	C	4	0		31MA	C	3	1		31M	C	3	2
31MA	C	4	0		31MA	C	3	0		31M	C	3	1
31MA	C	4	0		31MA	C	3	0		31M	C	3	0
31MA	T	1	0		31MA	C	3	0		31M	C	3	1
31MA	T	1	0		31MA	C	3	0		31M	C	3	1
31MA	T	1	0		31MA	C	3	0		31M	C	3	1
31MA	T	1	0		31MA	C	3	0		31M	C	4	2
31MA	T	1	0		31MA	C	4	0		31M	C	4	3
31MA	T	1	0		31MA	C	4	0		31M	C	4	2
31MA	T	1	0		31MA	C	4	1		31M	C	4	3
31MA	T	1	0		31MA	C	4	0		31M	C	4	3
31MA	T	1	0		31MA	C	4	0		31M	C	4	3
31MA	T	1	0		31MA	C	4	0		31M	C	4	3
31MA	T	2	0		31MA	C	4	0		31M	C	4	3
31MA	T	2	0		31MA	C	4	0		31M	C	4	3
31MA	T	2	0		31MA	C	4	0		31M	C	4	3
31MA	T	2	0		31MA	C	4	0		31M	T	1	2
31MA	T	2	0		31MA	T	1	0		31M	T	1	3
31MA	T	2	0		31MA	T	1	1		31M	T	1	2
31MA	T	2	0		31MA	T	1	0		31M	T	1	2
31MA	T	2	0		31MA	T	1	0		31M	T	1	1
31MA	T	2	0		31MA	T	1	0		31M	T	1	2
31MA	T	2	0		31MA	T	1	0		31M	T	1	0
31MA	T	3	0		31MA	T	1	0		31M	T	1	1
31MA	T	3	0		31MA	T	1	0		31M	T	1	0
31MA	T	3	0		31MA	T	1	0		31M	T	1	0
31MA	T	3	0		31MA	T	1	0		31M	T	2	3
31MA	T	3	0		31MA	T	2	0		31M	T	2	3
31MA	T	3	0		31MA	T	2	0		31M	T	2	1
31MA	T	3	0		31MA	T	2	0		31M	T	2	1
31MA	T	3	0		31MA	T	2	0		31M	T	2	1
31MA	T	3	0		31MA	T	2	0		31M	T	2	1
31MA	T	3	0		31MA	T	2	0		31M	T	2	1
31MA	T	4	0		31MA	T	2	0		31M	T	2	1
31MA	T	4	0		31MA	T	2	0		31M	T	2	2
31MA	T	4	0		31MA	T	2	0		31M	T	2	3
31MA	T	4	0		31MA	T	2	0		31M	T	3	0
31MA	T	4	0		31MA	T	3	2		31M	T	3	0
31MA	T	4	0		31MA	T	3	1		31M	T	3	3
31MA	T	4	0		31MA	T	3	1		31M	T	3	0
31MA	T	4	0		31MA	T	3	0		31M	T	3	0
31MA	T	4	0		31MA	T	3	0		31M	T	3	0
31MA	T	4	0		31MA	T	3	3		31M	T	3	0
13JU	A	1	2		31MA	T	3	1		31M	T	3	0
13JU	A	1	0		31MA	T	3	0		31M	T	3	0
13JU	A	1	0		31MA	T	3	0		31M	T	3	0
13JU	A	1	0		31MA	T	3	0		31M	T	4	1
13JU	A	1	1		31MA	T	4	0		31M	T	4	0
13JU	A	1	0		31MA	T	4	0		31M	T	4	0
13JU	A	1	0		31MA	T	4	0		31M	T	4	0
13JU	A	1	1		31MA	T	4	0		31M	T	4	0
13JU	A	1	1		31MA	T	4	0		31M	T	4	0
13JU	A	1	0		31MA	T	4	0		31M	T	4	0
13JU	A	2	0		31MA	T	4	1		31M	T	4	0
13JU	A	2	2		31MA	T	4	1		31M	T	4	0
13JU	A	2	2		31MA	T	4	1		31M	T	4	0
13JU	A	2	3		31MA	T	4	0		6A	A	1	1
13JU	A	2	4		29JU	A	1	1		6A	A	1	0
13JU	A	2	0		29JU	A	1	0		6A	A	1	3
13JU	A	2	1		29JU	A	1	0		6A	A	1	1
13JU	A	2	1		29JU	A	1	0		6A	A	1	3
13JU	A	2	0		29JU	A	1	0		6A	A	1	3
13JU	A	2	0		29JU	A	1	1		6A	A	1	2
13JU	A	3	0		29JU	A	1	1		6A	A	1	3
13JU	A	3	2		29JU	A	1	0		6A	A	1	3
13JU	A	3	7		29JU	A	1	0		6A	A	1	3
13JU	A	3	0		29JU	A	1	0		6A	A	2	1
13JU	A	3	3		29JU	A	2	1		6A	A	2	1
13JU	A	3	2		29JU	A	2	0		6A	A	2	3
13JU	A	3	1		29JU	A	2	0		6A	A	2	1
13JU	A	3	0		29JU	A	2	0		6A	A	2	1
13JU	A	3	1		29JU	A	2	0		6A	A	2	1
13JU	A	3	1		29JU	A	2	0		6A	A	2	1
13JU	A	4	3		29JU	A	2	0		6A	A	2	1
13JU	A	4	3		29JU	A	2	0		6A	A	2	1
13JU	A	4	7		29JU	A	2	1		6A	A	2	2
13JU	A	4	7		29JU	A	2	1		6A	A	3	0
13JU	A	4	2		29JU	A	3	0		6A	A	3	0
13JU	A	4	0		29JU	A	3	0		6A	A	3	0
13JU	A	4	1		29JU	A	3	0		6A	A	3	1
13JU	A	4	0		29JU	A	3	1		6A	A	3	2
13JU	A	4	2		29JU	A	3	0		6A	A	3	5
13JU	A	4	2		29JU	A	3	1		6A	A	3	0
13JU	B	1	7		29JU	A	3	1		6A	A	3	2
13JU	B	1	1		29JU	A	3	0		6A	A	3	0
13JU	B	1	2		29JU	A	3	0		6A	A	3	2
13JU	B	1	1		29JU	A	3	0		6A	A	4	2
13JU	B	1	3		29JU	A	4	0		6A	A	4	0
13JU	B	1	1		29JU	A	4	0		6A	A	4	0
13JU	B	1	1		29JU	A	4	0		6A	A	4	0
13JU	B	1	0		29JU	A	4	0		6A	A	4	2
13JU	B	1	0		29JU	A	4	1		6A	A	4	1
13JU	B	1	0		29JU	A	4	0		6A	A	4	1
13JU	B	2	1		29JU	A	4	1		6A	A	4	3
13JU	B	2	1		29JU	A	4	0		6A	A	4	0
13JU	B	2	1		29JU	A	4	0		6A	A	4	1
13JU	B	2	2		29JU	A	4	1		6A	B	1	0
13JU	B	2	3		29JU	B	1	1		6A	B	1	1
13JU	B	2	1		29JU	B	1	0		6A	B	1	2
13JU	B	2	1		29JU	B	1	1		6A	B	1	1
13JU	B	2	1		29JU	B	1	0		6A	B	1	0
13JU	B	2	2		29JU	B	1	0		6A	B	1	1
13JU	B	2	4		29JU	B	1	0		6A	B	1	1
13JU	B	3	1		29JU	B	1	0		6A	B	1	0
13JU	B	3	2		29JU	B	1	0		6A	B	1	0
13JU	B	3	1		29JU	B	1	0		6A	B	1	1
13JU	B	3	3		29JU	B	1	1		6A	B	2	1
13JU	B	3	2		29JU	B	2	1		6A	B	2	1
13JU	B	3	4		29JU	B	2	0		6A	B	2	0
13JU	B	3	1		29JU	B	2	0		6A	B	2	1
13JU	B	3	5		29JU	B	2	0		6A	B	2	1
13JU	B	3	0		29JU	B	2	0		6A	B	2	1
13JU	B	3	2		29JU	B	2	0		6A	B	2	1
13JU	B	4	2		29JU	B	2	0		6A	B	2	1
13JU	B	4	3		29JU	B	2	0		6A	B	2	1
13JU	B	4	4		29JU	B	2	0		6A	B	2	1
13JU	B	4	0		29JU	B	2	0		6A	B	3	3
13JU	B	4	1		29JU	B	3	0		6A	B	3	2
13JU	B	4	2		29JU	B	3	0		6A	B	3	1
13JU	B	4	3		29JU	B	3	0		6A	B	3	1
13JU	B	4	3		29JU	B	3	0		6A	B	3	3
13JU	B	4	4		29JU	B	3	0		6A	B	3	2
13JU	B	4	5		29JU	B	3	0		6A	B	3	2
13JU	UT	1	5		29JU	B	3	0		6A	B	3	3
13JU	UT	1	0		29JU	B	3	1		6A	B	3	3
13JU	UT	1	2		29JU	B	3	0		6A	B	3	3
13JU	UT	1	1		29JU	B	3	1		6A	B	4	2
13JU	UT	1	6		29JU	B	4	0		6A	B	4	3
13JU	UT	1	2		29JU	B	4	0		6A	B	4	1
13JU	UT	1	2		29JU	B	4	0		6A	B	4	1
13JU	UT	1	2		29JU	B	4	0		6A	B	4	1
13JU	UT	1	2		29JU	B	4	0		6A	B	4	0
13JU	UT	1	0		29JU	B	4	0		6A	B	4	1
13JU	UT	2	6		29JU	B	4	1		6A	B	4	1
13JU	UT	2	4		29JU	B	4	0		6A	B	4	1
13JU	UT	2	0		29JU	B	4	0		6A	B	4	1
13JU	UT	2	0		29JU	B	4	1		6A	UT	1	2
13JU	UT	2	2		29JU	UT	1	0		6A	UT	1	3
13JU	UT	2	3		29JU	UT	1	0		6A	UT	1	1
13JU	UT	2	5		29JU	UT	1	0		6A	UT	1	1
13JU	UT	2	4		29JU	UT	1	0		6A	UT	1	2
13JU	UT	2	1		29JU	UT	1	0		6A	UT	1	1
13JU	UT	2	0		29JU	UT	1	0		6A	UT	1	3
13JU	UT	3	4		29JU	UT	1	0		6A	UT	1	2
13JU	UT	3	3		29JU	UT	1	0		6A	UT	1	3
13JU	UT	3	3		29JU	UT	1	0		6A	UT	1	1
13JU	UT	3	1		29JU	UT	1	0		6A	UT	2	2
13JU	UT	3	0		29JU	UT	2	1		6A	UT	2	1
13JU	UT	3	0		29JU	UT	2	0		6A	UT	2	0
13JU	UT	3	1		29JU	UT	2	0		6A	UT	2	1
13JU	UT	3	1		29JU	UT	2	1		6A	UT	2	1
13JU	UT	3	1		29JU	UT	2	0		6A	UT	2	1
13JU	UT	3	1		29JU	UT	2	0		6A	UT	2	1
13JU	UT	4	6		29JU	UT	2	1		6A	UT	2	1
13JU	UT	4	0		29JU	UT	2	1		6A	UT	2	3
13JU	UT	4	6		29JU	UT	2	1		6A	UT	2	2
13JU	UT	4	1		29JU	UT	2	1		6A	UT	3	1
13JU	UT	4	5		29JU	UT	3	1		6A	UT	3	1
13JU	UT	4	0		29JU	UT	3	0		6A	UT	3	1
13JU	UT	4	0		29JU	UT	3	1		6A	UT	3	0
13JU	UT	4	0		29JU	UT	3	0		6A	UT	3	1
13JU	UT	4	0		29JU	UT	3	0		6A	UT	3	1
13JU	UT	4	0		29JU	UT	3	0		6A	UT	3	1
13JU	C	1	0		29JU	UT	3	1		6A	UT	3	1
13JU	C	1	1		29JU	UT	3	0		6A	UT	3	1
13JU	C	1	0		29JU	UT	3	1		6A	UT	3	2
13JU	C	1	2		29JU	UT	3	1		6A	UT	4	2
13JU	C	1	0		29JU	UT	4	1		6A	UT	4	3
13JU	C	1	0		29JU	UT	4	0		6A	UT	4	3
13JU	C	1	0		29JU	UT	4	0		6A	UT	4	2
13JU	C	1	0		29JU	UT	4	0		6A	UT	4	2
13JU	C	1	0		29JU	UT	4	1		6A	UT	4	3
13JU	C	1	0		29JU	UT	4	1		6A	UT	4	3
13JU	C	2	0		29JU	UT	4	0		6A	UT	4	3
13JU	C	2	1		29JU	UT	4	0		6A	UT	4	3
13JU	C	2	0		29JU	UT	4	0		6A	UT	4	3
13JU	C	2	1		29JU	UT	4	1		6A	C	1	1
13JU	C	2	0		29JU	C	1	0		6A	C	1	1
13JU	C	2	1		29JU	C	1	1		6A	C	1	2
13JU	C	2	0		29JU	C	1	0		6A	C	1	3
13JU	C	2	0		29JU	C	1	0		6A	C	1	2
13JU	C	2	1		29JU	C	1	0		6A	C	1	3
13JU	C	2	0		29JU	C	1	0		6A	C	1	3
13JU	C	3	0		29JU	C	1	0		6A	C	1	3
13JU	C	3	0		29JU	C	1	0		6A	C	1	1
13JU	C	3	0		29JU	C	1	0		6A	C	1	2
13JU	C	3	2		29JU	C	1	0		6A	C	2	2
13JU	C	3	0		29JU	C	2	1		6A	C	2	2
13JU	C	3	0		29JU	C	2	0		6A	C	2	0
13JU	C	3	0		29JU	C	2	0		6A	C	2	0
13JU	C	3	2		29JU	C	2	0		6A	C	2	1
13JU	C	3	1		29JU	C	2	0		6A	C	2	1
13JU	C	3	1		29JU	C	2	0		6A	C	2	0
13JU	C	4	0		29JU	C	2	0		6A	C	2	0
13JU	C	4	0		29JU	C	2	0		6A	C	2	0
13JU	C	4	0		29JU	C	2	0		6A	C	2	0
13JU	C	4	0		29JU	C	2	0		6A	C	3	3
13JU	C	4	0		29JU	C	3	0		6A	C	3	2
13JU	C	4	0		29JU	C	3	0		6A	C	3	2
13JU	C	4	0		29JU	C	3	0		6A	C	3	3
13JU	C	4	0		29JU	C	3	1		6A	C	3	2
13JU	C	4	0		29JU	C	3	0		6A	C	3	2
13JU	C	4	0		29JU	C	3	0		6A	C	3	2
13JU	T	1	0		29JU	C	3	0		6A	C	3	2
13JU	T	1	1		29JU	C	3	0		6A	C	3	2
13JU	T	1	0		29JU	C	3	0		6A	C	3	3
13JU	T	1	0		29JU	C	3	0		6A	C	4	3
13JU	T	1	1		29JU	C	4	0		6A	C	4	3
13JU	T	1	0		29JU	C	4	1		6A	C	4	0
13JU	T	1	1		29JU	C	4	0		6A	C	4	3
13JU	T	1	0		29JU	C	4	0		6A	C	4	3
13JU	T	1	0		29JU	C	4	0		6A	C	4	3
13JU	T	1	0		29JU	C	4	0		6A	C	4	2
13JU	T	2	0		29JU	C	4	0		6A	C	4	3
13JU	T	2	0		29JU	C	4	0		6A	C	4	3
13JU	T	2	2		29JU	C	4	0		6A	C	4	3
13JU	T	2	0		29JU	C	4	0		6A	T	1	2
13JU	T	2	1		29JU	T	1	0		6A	T	1	2
13JU	T	2	1		29JU	T	1	0		6A	T	1	3
13JU	T	2	0		29JU	T	1	0		6A	T	1	2
13JU	T	2	0		29JU	T	1	0		6A	T	1	1
13JU	T	2	0		29JU	T	1	0		6A	T	1	2
13JU	T	2	0		29JU	T	1	0		6A	T	1	2
13JU	T	3	0		29JU	T	1	0		6A	T	1	1
13JU	T	3	1		29JU	T	1	0		6A	T	1	3
13JU	T	3	0		29JU	T	1	0		6A	T	1	3
13JU	T	3	1		29JU	T	1	1		6A	T	2	1
13JU	T	3	4		29JU	T	2	0		6A	T	2	0
13JU	T	3	5		29JU	T	2	0		6A	T	2	1
13JU	T	3	2		29JU	T	2	0		6A	T	2	1
13JU	T	3	4		29JU	T	2	0		6A	T	2	1
13JU	T	3	7		29JU	T	2	0		6A	T	2	1
13JU	T	3	2		29JU	T	2	0		6A	T	2	3
13JU	T	4	0		29JU	T	2	0		6A	T	2	3
13JU	T	4	2		29JU	T	2	0		6A	T	2	3
13JU	T	4	3		29JU	T	2	0		6A	T	2	1
13JU	T	4	4		29JU	T	2	0		6A	T	3	1
13JU	T	4	0		29JU	T	3	0		6A	T	3	1
13JU	T	4	0		29JU	T	3	0		6A	T	3	1
13JU	T	4	0		29JU	T	3	0		6A	T	3	0
13JU	T	4	1		29JU	T	3	0		6A	T	3	0
13JU	T	4	2		29JU	T	3	0		6A	T	3	1
13JU	T	4	3		29JU	T	3	0		6A	T	3	1
6JL	A	1	0		29JU	T	3	0		6A	T	3	1
6JL	A	1	0		29JU	T	3	0		6A	T	3	0
6JL	A	1	0		29JU	T	3	1		6A	T	3	3
6JL	A	1	0		29JU	T	3	0		6A	T	4	1
6JL	A	1	0		29JU	T	4	0		6A	T	4	1
6JL	A	1	0		29JU	T	4	0		6A	T	4	1
6JL	A	1	0		29JU	T	4	0		6A	T	4	2
6JL	A	1	0		29JU	T	4	0		6A	T	4	1
6JL	A	1	0		29JU	T	4	0		6A	T	4	2
6JL	A	1	0		29JU	T	4	0		6A	T	4	1
6JL	A	2	0		29JU	T	4	0		6A	T	4	1
6JL	A	2	0		29JU	T	4	0		6A	T	4	1
6JL	A	2	0		29JU	T	4	0		6A	T	4	2
6JL	A	2	0		29JU	T	4	0		14A	A	1	3
6JL	A	2	0		13JU	A	1	1		14A	A	1	3
6JL	A	2	0		13JU	A	1	1		14A	A	1	3
6JL	A	2	0		13JU	A	1	1		14A	A	1	3
6JL	A	2	0		13JU	A	1	3		14A	A	1	3
6JL	A	2	0		13JU	A	1	1		14A	A	1	3
6JL	A	2	0		13JU	A	1	1		14A	A	1	3
6JL	A	3	0		13JU	A	1	0		14A	A	1	3
6JL	A	3	0		13JU	A	1	0		14A	A	1	3
6JL	A	3	0		13JU	A	1	1		14A	A	1	3
6JL	A	3	0		13JU	A	1	1		14A	A	2	1
6JL	A	3	0		13JU	A	2	2		14A	A	2	1
6JL	A	3	0		13JU	A	2	2		14A	A	2	1
6JL	A	3	0		13JU	A	2	1		14A	A	2	0
6JL	A	3	0		13JU	A	2	3		14A	A	2	1
6JL	A	3	0		13JU	A	2	3		14A	A	2	1
6JL	A	3	0		13JU	A	2	2		14A	A	2	0
6JL	A	4	0		13JU	A	2	3		14A	A	2	0
6JL	A	4	0		13JU	A	2	0		14A	A	2	3
6JL	A	4	0		13JU	A	2	0		14A	A	2	1
6JL	A	4	0		13JU	A	2	1		14A	A	3	2
6JL	A	4	0		13JU	A	3	0		14A	A	3	3
6JL	A	4	0		13JU	A	3	1		14A	A	3	3
6JL	A	4	0		13JU	A	3	1		14A	A	3	3
6JL	A	4	0		13JU	A	3	0		14A	A	3	3
6JL	A	4	0		13JU	A	3	3		14A	A	3	3
6JL	A	4	0		13JU	A	3	1		14A	A	3	1
6JL	B	1	0		13JU	A	3	0		14A	A	3	3
6JL	B	1	0		13JU	A	3	2		14A	A	3	3
6JL	B	1	0		13JU	A	3	0		14A	A	4	1
6JL	B	1	0		13JU	A	3	2		14A	A	4	3
6JL	B	1	0		13JU	A	4	1		14A	A	4	3
6JL	B	1	0		13JU	A	4	1		14A	A	4	3
6JL	B	1	0		13JU	A	4	1		14A	A	4	3
6JL	B	1	0		13JU	A	4	1		14A	A	4	1
6JL	B	1	0		13JU	A	4	0		14A	A	4	1
6JL	B	1	0		13JU	A	4	0		14A	A	4	1
6JL	B	2	0		13JU	A	4	0		14A	A	4	2
6JL	B	2	0		13JU	A	4	1		14A	A	4	2
6JL	B	2	0		13JU	A	4	0		14A	B	1	1
6JL	B	2	0		13JU	A	4	2		14A	B	1	3
6JL	B	2	0		13JU	B	1	1		14A	B	1	3
6JL	B	2	0		13JU	B	1	0		14A	B	1	3
6JL	B	2	0		13JU	B	1	0		14A	B	1	3
6JL	B	2	0		13JU	B	1	3		14A	B	1	0
6JL	B	2	0		13JU	B	1	2		14A	B	1	3
6JL	B	2	0		13JU	B	1	0		14A	B	1	2
6JL	B	3	0		13JU	B	1	1		14A	B	1	3
6JL	B	3	0		13JU	B	1	0		14A	B	1	2
6JL	B	3	0		13JU	B	1	3		14A	B	2	2
6JL	B	3	0		13JU	B	1	0		14A	B	2	1
6JL	B	3	0		13JU	B	2	3		14A	B	2	3
6JL	B	3	0		13JU	B	2	0		14A	B	2	2
6JL	B	3	0		13JU	B	2	2		14A	B	2	3
6JL	B	3	0		13JU	B	2	2		14A	B	2	1
6JL	B	3	0		13JU	B	2	2		14A	B	2	3
6JL	B	3	0		13JU	B	2	3		14A	B	2	3
6JL	B	4	0		13JU	B	2	2		14A	B	2	3
6JL	B	4	0		13JU	B	2	2		14A	B	2	2
6JL	B	4	0		13JU	B	2	3		14A	B	3	1
6JL	B	4	0		13JU	B	2	3		14A	B	3	2
6JL	B	4	0		13JU	B	3	0		14A	B	3	3
6JL	B	4	0		13JU	B	3	1		14A	B	3	3
6JL	B	4	0		13JU	B	3	1		14A	B	3	3
6JL	B	4	0		13JU	B	3	0		14A	B	3	1
6JL	B	4	0		13JU	B	3	0		14A	B	3	2
6JL	B	4	0		13JU	B	3	1		14A	B	3	3
6JL	UT	1	1		13JU	B	3	0		14A	B	3	3
6JL	UT	1	2		13JU	B	3	0		14A	B	3	1
6JL	UT	1	1		13JU	B	3	0		14A	B	4	0
6JL	UT	1	1		13JU	B	3	1		14A	B	4	1
6JL	UT	1	1		13JU	B	4	0		14A	B	4	1
6JL	UT	1	1		13JU	B	4	0		14A	B	4	1
6JL	UT	1	0		13JU	B	4	0		14A	B	4	3
6JL	UT	1	1		13JU	B	4	0		14A	B	4	2
6JL	UT	1	0		13JU	B	4	0		14A	B	4	1
6JL	UT	1	0		13JU	B	4	2		14A	B	4	1
6JL	UT	2	2		13JU	B	4	2		14A	B	4	3
6JL	UT	2	2		13JU	B	4	1		14A	B	4	1
6JL	UT	2	0		13JU	B	4	3		14A	UT	1	0
6JL	UT	2	0		13JU	B	4	1		14A	UT	1	2
6JL	UT	2	2		13JU	UT	1	1		14A	UT	1	1
6JL	UT	2	5		13JU	UT	1	1		14A	UT	1	0
6JL	UT	2	2		13JU	UT	1	1		14A	UT	1	0
6JL	UT	2	0		13JU	UT	1	1		14A	UT	1	0
6JL	UT	2	0		13JU	UT	1	3		14A	UT	1	3
6JL	UT	2	0		13JU	UT	1	3		14A	UT	1	1
6JL	UT	3	1		13JU	UT	1	2		14A	UT	1	3
6JL	UT	3	5		13JU	UT	1	2		14A	UT	1	3
6JL	UT	3	0		13JU	UT	1	0		14A	UT	2	0
6JL	UT	3	0		13JU	UT	1	1		14A	UT	2	3
6JL	UT	3	0		13JU	UT	2	0		14A	UT	2	3
6JL	UT	3	0		13JU	UT	2	0		14A	UT	2	3
6JL	UT	3	0		13JU	UT	2	0		14A	UT	2	3
6JL	UT	3	0		13JU	UT	2	0		14A	UT	2	1
6JL	UT	3	0		13JU	UT	2	1		14A	UT	2	1
6JL	UT	3	0		13JU	UT	2	1		14A	UT	2	0
6JL	UT	4	0		13JU	UT	2	1		14A	UT	2	3
6JL	UT	4	0		13JU	UT	2	1		14A	UT	2	3
6JL	UT	4	2		13JU	UT	2	0		14A	UT	3	1
6JL	UT	4	3		13JU	UT	2	0		14A	UT	3	1
6JL	UT	4	2		13JU	UT	3	1		14A	UT	3	0
6JL	UT	4	0		13JU	UT	3	1		14A	UT	3	0
6JL	UT	4	0		13JU	UT	3	1		14A	UT	3	1
6JL	UT	4	0		13JU	UT	3	0		14A	UT	3	1
6JL	UT	4	0		13JU	UT	3	1		14A	UT	3	3
6JL	UT	4	0		13JU	UT	3	1		14A	UT	3	1
6JL	C	1	0		13JU	UT	3	1		14A	UT	3	0
6JL	C	1	0		13JU	UT	3	1		14A	UT	3	0
6JL	C	1	0		13JU	UT	3	2		14A	UT	4	2
6JL	C	1	0		13JU	UT	3	2		14A	UT	4	1
6JL	C	1	0		13JU	UT	4	3		14A	UT	4	1
6JL	C	1	0		13JU	UT	4	1		14A	UT	4	0
6JL	C	1	0		13JU	UT	4	2		14A	UT	4	1
6JL	C	1	0		13JU	UT	4	1		14A	UT	4	1
6JL	C	1	0		13JU	UT	4	0		14A	UT	4	3
6JL	C	1	0		13JU	UT	4	1		14A	UT	4	3
6JL	C	2	0		13JU	UT	4	0		14A	UT	4	1
6JL	C	2	0		13JU	UT	4	1		14A	UT	4	0
6JL	C	2	1		13JU	UT	4	1		14A	C	1	3
6JL	C	2	0		13JU	UT	4	1		14A	C	1	0
6JL	C	2	0		13JU	C	1	0		14A	C	1	3
6JL	C	2	0		13JU	C	1	0		14A	C	1	3
6JL	C	2	0		13JU	C	1	0		14A	C	1	1
6JL	C	2	0		13JU	C	1	0		14A	C	1	3
6JL	C	2	0		13JU	C	1	0		14A	C	1	1
6JL	C	2	0		13JU	C	1	0		14A	C	1	1
6JL	C	3	0		13JU	C	1	0		14A	C	1	0
6JL	C	3	0		13JU	C	1	0		14A	C	1	3
6JL	C	3	0		13JU	C	1	0		14A	C	2	1
6JL	C	3	0		13JU	C	1	1		14A	C	2	1
6JL	C	3	0		13JU	C	2	1		14A	C	2	0
6JL	C	3	0		13JU	C	2	0		14A	C	2	2
6JL	C	3	0		13JU	C	2	0		14A	C	2	2
6JL	C	3	0		13JU	C	2	0		14A	C	2	1
6JL	C	3	0		13JU	C	2	0		14A	C	2	2
6JL	C	3	0		13JU	C	2	1		14A	C	2	1
6JL	C	4	0		13JU	C	2	0		14A	C	2	2
6JL	C	4	0		13JU	C	2	1		14A	C	2	2
6JL	C	4	0		13JU	C	2	0		14A	C	3	2
6JL	C	4	0		13JU	C	2	2		14A	C	3	0
6JL	C	4	0		13JU	C	3	0		14A	C	3	0
6JL	C	4	0		13JU	C	3	0		14A	C	3	1
6JL	C	4	0		13JU	C	3	1		14A	C	3	1
6JL	C	4	0		13JU	C	3	0		14A	C	3	1
6JL	C	4	0		13JU	C	3	0		14A	C	3	3
6JL	C	4	0		13JU	C	3	0		14A	C	3	1
6JL	T	1	1		13JU	C	3	0		14A	C	3	2
6JL	T	1	0		13JU	C	3	0		14A	C	3	0
6JL	T	1	0		13JU	C	3	0		14A	C	4	1
6JL	T	1	0		13JU	C	3	0		14A	C	4	3
6JL	T	1	0		13JU	C	4	0		14A	C	4	0
6JL	T	1	0		13JU	C	4	0		14A	C	4	2
6JL	T	1	0		13JU	C	4	0		14A	C	4	3
6JL	T	1	0		13JU	C	4	0		14A	C	4	2
6JL	T	1	0		13JU	C	4	0		14A	C	4	3
6JL	T	1	0		13JU	C	4	0		14A	C	4	0
6JL	T	2	1		13JU	C	4	0		14A	C	4	3
6JL	T	2	0		13JU	C	4	0		14A	C	4	3
6JL	T	2	0		13JU	C	4	0		14A	T	1	0
6JL	T	2	0		13JU	C	4	0		14A	T	1	1
6JL	T	2	0		13JU	T	1	0		14A	T	1	3
6JL	T	2	0		13JU	T	1	0		14A	T	1	3
6JL	T	2	0		13JU	T	1	1		14A	T	1	2
6JL	T	2	0		13JU	T	1	2		14A	T	1	1
6JL	T	2	0		13JU	T	1	0		14A	T	1	0
6JL	T	2	0		13JU	T	1	0		14A	T	1	0
6JL	T	3	0		13JU	T	1	1		14A	T	1	0
6JL	T	3	0		13JU	T	1	0		14A	T	1	1
6JL	T	3	0		13JU	T	1	0		14A	T	2	1
6JL	T	3	0		13JU	T	1	0		14A	T	2	1
6JL	T	3	0		13JU	T	2	0		14A	T	2	3
6JL	T	3	0		13JU	T	2	0		14A	T	2	3
6JL	T	3	0		13JU	T	2	0		14A	T	2	3
6JL	T	3	0		13JU	T	2	0		14A	T	2	1
6JL	T	3	0		13JU	T	2	0		14A	T	2	1
6JL	T	3	0		13JU	T	2	2		14A	T	2	3
6JL	T	4	0		13JU	T	2	0		14A	T	2	0
6JL	T	4	0		13JU	T	2	0		14A	T	2	2
6JL	T	4	0		13JU	T	2	0		14A	T	3	1
6JL	T	4	0		13JU	T	3	0		14A	T	3	1
6JL	T	4	0		13JU	T	3	0		14A	T	3	1
6JL	T	4	0		13JU	T	3	0		14A	T	3	3
6JL	T	4	0		13JU	T	3	0		14A	T	3	0
6JL	T	4	0		13JU	T	3	0		14A	T	3	1
6JL	T	4	0		13JU	T	3	1		14A	T	3	3
6JL	T	4	0		13JU	T	3	0		14A	T	3	1
20JL	A	1	0		13JU	T	3	0		14A	T	3	1
20JL	A	1	0		13JU	T	3	0		14A	T	3	3
20JL	A	1	0		13JU	T	3	0		14A	T	4	3
20JL	A	1	0		13JU	T	4	0		14A	T	4	1
20JL	A	1	0		13JU	T	4	0		14A	T	4	1
20JL	A	1	0		13JU	T	4	1		14A	T	4	0
20JL	A	1	0		13JU	T	4	0		14A	T	4	3
20JL	A	1	0		13JU	T	4	0		14A	T	4	1
20JL	A	1	0		13JU	T	4	1		14A	T	4	3
20JL	A	1	0		13JU	T	4	1		14A	T	4	2
20JL	A	2	0		13JU	T	4	1		14A	T	4	3
20JL	A	2	0		13JU	T	4	0		14A	T	4	0
20JL	A	2	0		13JU	T	4	3		21A	A	1	3
20JL	A	2	0		6JL	A	1	1		21A	A	1	3
20JL	A	2	0		6JL	A	1	2		21A	A	1	3
20JL	A	2	0		6JL	A	1	2		21A	A	1	3
20JL	A	2	0		6JL	A	1	0		21A	A	1	3
20JL	A	2	0		6JL	A	1	0		21A	A	1	3
20JL	A	2	0		6JL	A	1	0		21A	A	1	3
20JL	A	2	0		6JL	A	1	0		21A	A	1	3
20JL	A	3	0		6JL	A	1	0		21A	A	1	3
20JL	A	3	0		6JL	A	1	0		21A	A	1	3
20JL	A	3	0		6JL	A	1	0		21A	A	2	3
20JL	A	3	0		6JL	A	2	0		21A	A	2	2
20JL	A	3	0		6JL	A	2	0		21A	A	2	3
20JL	A	3	0		6JL	A	2	0		21A	A	2	3
20JL	A	3	0		6JL	A	2	0		21A	A	2	1
20JL	A	3	0		6JL	A	2	0		21A	A	2	1
20JL	A	3	0		6JL	A	2	0		21A	A	2	3
20JL	A	3	0		6JL	A	2	0		21A	A	2	2
20JL	A	4	0		6JL	A	2	0		21A	A	2	2
20JL	A	4	0		6JL	A	2	0		21A	A	2	2
20JL	A	4	0		6JL	A	2	0		21A	A	3	1
20JL	A	4	0		6JL	A	3	0		21A	A	3	0
20JL	A	4	0		6JL	A	3	0		21A	A	3	1
20JL	A	4	0		6JL	A	3	0		21A	A	3	2
20JL	A	4	0		6JL	A	3	0		21A	A	3	1
20JL	A	4	0		6JL	A	3	0		21A	A	3	1
20JL	A	4	0		6JL	A	3	0		21A	A	3	2
20JL	A	4	0		6JL	A	3	0		21A	A	3	3
20JL	B	1	2		6JL	A	3	0		21A	A	3	0
20JL	B	1	2		6JL	A	3	0		21A	A	3	1
20JL	B	1	1		6JL	A	3	0		21A	A	4	3
20JL	B	1	0		6JL	A	4	0		21A	A	4	3
20JL	B	1	0		6JL	A	4	0		21A	A	4	3
20JL	B	1	0		6JL	A	4	0		21A	A	4	3
20JL	B	1	1		6JL	A	4	0		21A	A	4	3
20JL	B	1	2		6JL	A	4	0		21A	A	4	3
20JL	B	1	0		6JL	A	4	0		21A	A	4	3
20JL	B	1	0		6JL	A	4	0		21A	A	4	3
20JL	B	2	1		6JL	A	4	0		21A	A	4	3
20JL	B	2	0		6JL	A	4	0		21A	A	4	3
20JL	B	2	0		6JL	A	4	0		21A	B	1	3
20JL	B	2	0		6JL	B	1	0		21A	B	1	3
20JL	B	2	0		6JL	B	1	0		21A	B	1	3
20JL	B	2	0		6JL	B	1	0		21A	B	1	3
20JL	B	2	0		6JL	B	1	0		21A	B	1	3
20JL	B	2	0		6JL	B	1	2		21A	B	1	3
20JL	B	2	0		6JL	B	1	0		21A	B	1	2
20JL	B	2	1		6JL	B	1	0		21A	B	1	3
20JL	B	3	1		6JL	B	1	0		21A	B	1	3
20JL	B	3	0		6JL	B	1	0		21A	B	1	3
20JL	B	3	0		6JL	B	1	0		21A	B	2	3
20JL	B	3	0		6JL	B	2	0		21A	B	2	3
20JL	B	3	0		6JL	B	2	0		21A	B	2	2
20JL	B	3	0		6JL	B	2	0		21A	B	2	3
20JL	B	3	0		6JL	B	2	1		21A	B	2	3
20JL	B	3	0		6JL	B	2	0		21A	B	2	3
20JL	B	3	0		6JL	B	2	0		21A	B	2	3
20JL	B	3	0		6JL	B	2	0		21A	B	2	3
20JL	B	4	1		6JL	B	2	0		21A	B	2	3
20JL	B	4	3		6JL	B	2	1		21A	B	2	1
20JL	B	4	0		6JL	B	2	0		21A	B	3	3
20JL	B	4	0		6JL	B	3	0		21A	B	3	3
20JL	B	4	0		6JL	B	3	0		21A	B	3	3
20JL	B	4	0		6JL	B	3	0		21A	B	3	2
20JL	B	4	0		6JL	B	3	1		21A	B	3	3
20JL	B	4	0		6JL	B	3	0		21A	B	3	3
20JL	B	4	0		6JL	B	3	3		21A	B	3	2
20JL	B	4	0		6JL	B	3	0		21A	B	3	3
20JL	UT	1	1		6JL	B	3	1		21A	B	3	3
20JL	UT	1	1		6JL	B	3	0		21A	B	3	3
20JL	UT	1	1		6JL	B	3	0		21A	B	4	3
20JL	UT	1	2		6JL	B	4	0		21A	B	4	3
20JL	UT	1	3		6JL	B	4	0		21A	B	4	3
20JL	UT	1	1		6JL	B	4	0		21A	B	4	3
20JL	UT	1	0		6JL	B	4	1		21A	B	4	2
20JL	UT	1	0		6JL	B	4	0		21A	B	4	3
20JL	UT	1	3		6JL	B	4	1		21A	B	4	3
20JL	UT	1	1		6JL	B	4	0		21A	B	4	2
20JL	UT	2	6		6JL	B	4	0		21A	B	4	1
20JL	UT	2	2		6JL	B	4	1		21A	B	4	2
20JL	UT	2	1		6JL	B	4	0		21A	UT	1	3
20JL	UT	2	2		6JL	UT	1	1		21A	UT	1	3
20JL	UT	2	0		6JL	UT	1	1		21A	UT	1	3
20JL	UT	2	1		6JL	UT	1	1		21A	UT	1	3
20JL	UT	2	1		6JL	UT	1	1		21A	UT	1	3
20JL	UT	2	2		6JL	UT	1	0		21A	UT	1	3
20JL	UT	2	0		6JL	UT	1	1		21A	UT	1	3
20JL	UT	2	0		6JL	UT	1	1		21A	UT	1	3
20JL	UT	3	3		6JL	UT	1	1		21A	UT	1	3
20JL	UT	3	2		6JL	UT	1	1		21A	UT	1	3
20JL	UT	3	2		6JL	UT	1	1		21A	UT	2	3
20JL	UT	3	1		6JL	UT	2	0		21A	UT	2	3
20JL	UT	3	0		6JL	UT	2	1		21A	UT	2	3
20JL	UT	3	0		6JL	UT	2	0		21A	UT	2	3
20JL	UT	3	1		6JL	UT	2	1		21A	UT	2	3
20JL	UT	3	0		6JL	UT	2	3		21A	UT	2	3
20JL	UT	3	1		6JL	UT	2	1		21A	UT	2	2
20JL	UT	3	0		6JL	UT	2	0		21A	UT	2	2
20JL	UT	4	0		6JL	UT	2	1		21A	UT	2	2
20JL	UT	4	2		6JL	UT	2	1		21A	UT	2	3
20JL	UT	4	2		6JL	UT	2	3		21A	UT	3	1
20JL	UT	4	2		6JL	UT	3	1		21A	UT	3	1
20JL	UT	4	2		6JL	UT	3	1		21A	UT	3	3
20JL	UT	4	2		6JL	UT	3	1		21A	UT	3	3
20JL	UT	4	0		6JL	UT	3	0		21A	UT	3	2
20JL	UT	4	0		6JL	UT	3	1		21A	UT	3	2
20JL	UT	4	0		6JL	UT	3	1		21A	UT	3	3
20JL	UT	4	0		6JL	UT	3	0		21A	UT	3	1
20JL	C	1	1		6JL	UT	3	1		21A	UT	3	1
20JL	C	1	0		6JL	UT	3	2		21A	UT	3	1
20JL	C	1	0		6JL	UT	3	1		21A	UT	4	3
20JL	C	1	0		6JL	UT	4	0		21A	UT	4	3
20JL	C	1	0		6JL	UT	4	1		21A	UT	4	3
20JL	C	1	0		6JL	UT	4	0		21A	UT	4	3
20JL	C	1	0		6JL	UT	4	1		21A	UT	4	3
20JL	C	1	0		6JL	UT	4	3		21A	UT	4	3
20JL	C	1	0		6JL	UT	4	1		21A	UT	4	3
20JL	C	1	0		6JL	UT	4	0		21A	UT	4	3
20JL	C	2	0		6JL	UT	4	1		21A	UT	4	3
20JL	C	2	2		6JL	UT	4	1		21A	UT	4	3
20JL	C	2	0		6JL	UT	4	3		21A	C	1	1
20JL	C	2	0		6JL	C	1	3		21A	C	1	3
20JL	C	2	0		6JL	C	1	1		21A	C	1	3
20JL	C	2	0		6JL	C	1	0		21A	C	1	3
20JL	C	2	0		6JL	C	1	0		21A	C	1	3
20JL	C	2	0		6JL	C	1	2		21A	C	1	1
20JL	C	2	0		6JL	C	1	0		21A	C	1	3
20JL	C	2	0		6JL	C	1	0		21A	C	1	1
20JL	C	3	0		6JL	C	1	0		21A	C	1	2
20JL	C	3	0		6JL	C	1	0		21A	C	1	3
20JL	C	3	0		6JL	C	1	1		21A	C	2	3
20JL	C	3	0		6JL	C	2	0		21A	C	2	3
20JL	C	3	0		6JL	C	2	0		21A	C	2	3
20JL	C	3	0		6JL	C	2	0		21A	C	2	2
20JL	C	3	0		6JL	C	2	0		21A	C	2	3
20JL	C	3	0		6JL	C	2	2		21A	C	2	3
20JL	C	3	0		6JL	C	2	0		21A	C	2	2
20JL	C	3	0		6JL	C	2	1		21A	C	2	1
20JL	C	4	0		6JL	C	2	0		21A	C	2	3
20JL	C	4	0		6JL	C	2	1		21A	C	2
20JL	C	4	0		6JL	C	2	0		21A	C	3	2
20JL	C	4	0		6JL	C	3	0		21A	C	3	3
20JL	C	4	0		6JL	C	3	0		21A	C	3	1
20JL	C	4	0		6JL	C	3	0		21A	C	3	3
20JL	C	4	0		6JL	C	3	0		21A	C	3	1
20JL	C	4	0		6JL	C	3	0		21A	C	3	0
20JL	C	4	0		6JL	C	4	0		21A	C	3	2
20JL	C	4	0		6JL	C	4	0		21A	C	3	1
20JL	T	1	0		6JL	C	4	0		21A	C	3	3
20JL	T	1	0		6JL	C	4	0		21A	C	3	2
20JL	T	1	0		6JL	C	4	0		21A	C	4	3
20JL	T	1	0		6JL	C	4	0		21A	C	4	3
20JL	T	1	0		6JL	C	4	0		21A	C	4	3
20JL	T	1	0		6JL	C	4	0		21A	C	4	3
20JL	T	1	0		6JL	C	4	0		21A	C	4	3
20JL	T	1	0		6JL	C	4	0		21A	C	4	3
20JL	T	1	0		6JL	T	1	3		21A	C	4	3
20JL	T	1	0		6JL	T	1	0		21A	C	4	3
20JL	T	2	0		6JL	T	1	0		21A	C	4	3
20JL	T	2	0		6JL	T	1	0		21A	C	4	3
20JL	T	2	0		6JL	T	1	2		21A	T	1	3
20JL	T	2	0		6JL	T	1	0		21A	T	1	3
20JL	T	2	0		6JL	T	1	0		21A	T	1	3
20JL	T	2	0		6JL	T	1	0		21A	T	1	3
20JL	T	2	0		6JL	T	1	0		21A	T	1	1
20JL	T	2	0		6JL	T	1	0		21A	T	1	3
20JL	T	2	0		6JL	T	2	0		21A	T	1	3
20JL	T	2	0		6JL	T	2	0		21A	T	1	3
20JL	T	3	1		6JL	T	2	2		21A	T	1	3
20JL	T	3	0		6JL	T	2	2		21A	T	1	3
20JL	T	3	0		6JL	T	2	2		21A	T	2	3
20JL	T	3	0		6JL	T	2	0		21A	T	2	1
20JL	T	3	0		6JL	T	2	0		21A	T	2	3
20JL	T	3	0		6JL	T	2	0		21A	T	2	3
20JL	T	3	0		6JL	T	2	0		21A	T	2	1
20JL	T	3	0		6JL	T	2	0		21A	T	2	1
20JL	T	3	0		6JL	T	3	0		21A	T	2	1
20JL	T	3	0		6JL	T	3	0		21A	T	2	3
20JL	T	4	0		6JL	T	3	0		21A	T	2	3
20JL	T	4	0		6JL	T	3	0		21A	T	2	3
20JL	T	4	0		6JL	T	3	0		21A	T	3	3
20JL	T	4	0		6JL	T	3	2		21A	T	3	3
20JL	T	4	0		6JL	T	3	0		21A	T	3	3
20JL	T	4	1		6JL	T	3	0		21A	T	3	2
20JL	T	4	1		6JL	T	3	0		21A	T	3	3
20JL	T	4	0		6JL	T	3	0		21A	T	3	3
20JL	T	4	0		6JL	T	4	1		21A	T	3	1
20JL	T	4	0		6JL	T	4	1		21A	T	3	3
4AU	A	1	0		6JL	T	4	0		21A	T	3	3
4AU	A	1	0		6JL	T	4	1		21A	T	4	3
4AU	A	1	0		6JL	T	4	0		21A	T	4	3
4AU	A	1	0		6JL	T	4	1		21A	T	4	3
4AU	A	1	0		6JL	T	4	0		21A	T	4	3
4AU	A	1	0		6JL	T	4	0		21A	T	4	2
4AU	A	1	0		6JL	T	4	0		21A	T	4	3
4AU	A	1	0		6JL	T	4	0		21A	T	4	3
4AU	A	1	0		13JL	A	1	0		21A	T	4	3
4AU	A	1	0		13JL	A	1	0		21A	T	4	3
4AU	A	2	0		13JL	A	1	0		21A	T	4	3
4AU	A	2	0		13JL	A	1	0		27A	A	1	2
4AU	A	2	0		13JL	A	1	0		27A	A	1	3
4AU	A	2	0		13JL	A	1	0		27A	A	1	3
4AU	A	2	0		13JL	A	1	0		27A	A	1	3
4AU	A	2	0		13JL	A	1	0		27A	A	1	3
4AU	A	2	0		13JL	A	1	0		27A	A	1	2
4AU	A	2	0		13JL	A	1	0		27A	A	1	3
4AU	A	2	0		13JL	A	2	0		27A	A	1	3
4AU	A	2	0		13JL	A	2	0		27A	A	1	3
4AU	A	3	1		13JL	A	2	0		27A	A	1	3
4AU	A	3	0		13JL	A	2	0		27A	A	2	3
4AU	A	3	0		13JL	A	2	0		27A	A	2	3
4AU	A	3	0		13JL	A	2	0		27A	A	2	3
4AU	A	3	0		13JL	A	2	0		27A	A	2	3
4AU	A	3	0		13JL	A	2	0		27A	A	2	2
4AU	A	3	0		13JL	A	2	0		27A	A	2	3
4AU	A	3	0		13JL	A	2	0		27A	A	2	2
4AU	A	3	0		13JL	A	3	0		27A	A	2	4
4AU	A	3	0		13JL	A	3	0		27A	A	2	3
4AU	A	4	0		13JL	A	3	0		27A	A	2	3
4AU	A	4	0		13JL	A	3	0		27A	A	3	2
4AU	A	4	0		13JL	A	3	0		27A	A	3	3
4AU	A	4	0		13JL	A	3	0		27A	A	3	1
4AU	A	4	0		13JL	A	3	0		27A	A	3	3
4AU	A	4	0		13JL	A	3	0		27A	A	3	1
4AU	A	4	0		13JL	A	3	0		27A	A	3	3
4AU	A	4	0		13JL	A	3	0		27A	A	3	3
4AU	A	4	0		13JL	A	4	0		27A	A	3	3
4AU	A	4	0		13JL	A	4	0		27A	A	3	3
4AU	B	1	0		13JL	A	4	0		27A	A	3	3
4AU	B	1	0		13JL	A	4	0		27A	A	4	3
4AU	B	1	0		13JL	A	4	0		27A	A	4	3
4AU	B	1	0		13JL	A	4	0		27A	A	4	3
4AU	B	1	0		13JL	A	4	0		27A	A	4	3
4AU	B	1	0		13JL	A	4	0		27A	A	4	3
4AU	B	1	0		13JL	A	4	0		27A	A	4	3
4AU	B	1	0		13JL	A	4	0		27A	A	4	3
4AU	B	1	0		13JL	B	1	0		27A	A	4	3
4AU	B	1	0		13JL	B	1	0		27A	A	4	3
4AU	B	2	0		13JL	B	1	1		27A	A	4	1
4AU	B	2	0		13JL	B	1	0		27A	B	1	3
4AU	B	2	0		13JL	B	1	0		27A	B	1	1
4AU	B	2	0		13JL	B	1	0		27A	B	1	3
4AU	B	2	0		13JL	B	1	1		27A	B	1	0
4AU	B	2	0		13JL	B	1	0		27A	B	1	1
4AU	B	2	0		13JL	B	1	0		27A	B	1	0
4AU	B	2	0		13JL	B	1	0		27A	B	1	3
4AU	B	2	0		13JL	B	2	0		27A	B	1	2
4AU	B	2	0		13JL	B	2	1		27A	B	1	3
4AU	B	3	0		13JL	B	2	0		27A	B	1	3
4AU	B	3	0		13JL	B	2	0		27A	B	2	3
4AU	B	3	0		13JL	B	2	0		27A	B	2	1
4AU	B	3	0		13JL	B	2	1		27A	B	2	3
4AU	B	3	0		13JL	B	2	0		27A	B	2	2
4AU	B	3	0		13JL	B	2	0		27A	B	2	3
4AU	B	3	0		13JL	B	2	2		27A	B	2	3
4AU	B	3	0		13JL	B	2	0		27A	B	2	3
4AU	B	3	0		13JL	B	3	0		27A	B	2	3
4AU	B	3	0		13JL	B	3	0		27A	B	2	3
4AU	B	4	0		13JL	B	3	0		27A	B	2	3
4AU	B	4	0		13JL	B	3	0		27A	B	3	1
4AU	B	4	0		13JL	B	3	1		27A	B	3	1
4AU	B	4	0		13JL	B	3	0		27A	B	3	3
4AU	B	4	0		13JL	B	3	0		27A	B	3	3
4AU	B	4	0		13JL	B	3	0		27A	B	3	3
4AU	B	4	0		13JL	B	3	0		27A	B	3	3
4AU	B	4	0		13JL	B	3	0		27A	B	3	3
4AU	B	4	0		13JL	B	4	0		27A	B	3	1
4AU	B	4	0		13JL	B	4	0		27A	B	3	3
4AU	UT	1	1		13JL	B	4	0		27A	B	3	3
4AU	UT	1	1		13JL	B	4	1		27A	B	4	2
4AU	UT	1	1		13JL	B	4	1		27A	B	4	3
4AU	UT	1	0		13JL	B	4	1		27A	B	4	2
4AU	UT	1	0		13JL	B	4	1		27A	B	4	2
4AU	UT	1	0		13JL	B	4	0		27A	B	4	3
4AU	UT	1	0		13JL	B	4	0		27A	B	4	2
4AU	UT	1	0		13JL	B	4	0		27A	B	4	3
4AU	UT	1	0		13JL	UT	1	0		27A	B	4	3
4AU	UT	1	0		13JL	UT	1	1		27A	B	4	3
4AU	UT	2	2		13JL	UT	1	0		27A	UT	1	1
4AU	UT	2	1		13JL	UT	1	0		27A	UT	1	2
4AU	UT	2	1		13JL	UT	1	1		27A	UT	1	2
4AU	UT	2	1		13JL	UT	1	0		27A	UT	1	3
4AU	UT	2	1		13JL	UT	1	3		27A	UT	1	3
4AU	UT	2	1		13JL	UT	1	3		27A	UT	1	3
4AU	UT	2	0		13JL	UT	1	1		27A	UT	1	3
4AU	UT	2	0		13JL	UT	1	1		27A	UT	1	1
4AU	UT	2	0		13JL	UT	2	0		27A	UT	1	1
4AU	UT	2	0		13JL	UT	2	0		27A	UT	1	3
4AU	UT	3	0		13JL	UT	2	1		27A	UT	2	1
4AU	UT	3	0		13JL	UT	2	1		27A	UT	2	1
4AU	UT	3	0		13JL	UT	2	0		27A	UT	2	3
4AU	UT	3	0		13JL	UT	2	0		27A	UT	2	2
4AU	UT	3	0		13JL	UT	2	0		27A	UT	2	2
4AU	UT	3	0		13JL	UT	2	0		27A	UT	2	3
4AU	UT	3	0		13JL	UT	2	0		27A	UT	2	2
4AU	UT	3	0		13JL	UT	2	0		27A	UT	2	2
4AU	UT	3	0		13JL	UT	3	0		27A	UT	2	3
4AU	UT	3	0		13JL	UT	3	1		27A	UT	2	3
4AU	UT	4	1		13JL	UT	3	1		27A	UT	3	3
4AU	UT	4	1		13JL	UT	3	0		27A	UT	3	3
4AU	UT	4	3		13JL	UT	3	0		27A	UT	3	3
4AU	UT	4	1		13JL	UT	3	2		27A	UT	3	3
4AU	UT	4	0		13JL	UT	3	1		27A	UT	3	3
4AU	UT	4	0		13JL	UT	3	1		27A	UT	3	3
4AU	UT	4	0		13JL	UT	3	1		27A	UT	3	3
4AU	UT	4	0		13JL	UT	3	0		27A	UT	3	3
4AU	UT	4	0		13JL	UT	4	0		27A	UT	3	3
4AU	UT	4	0		13JL	UT	4	0		27A	UT	3	3
4AU	C	1	0		13JL	UT	4	0		27A	UT	4	1
4AU	C	1	0		13JL	UT	4	0		27A	UT	4	3
4AU	C	1	0		13JL	UT	4	0		27A	UT	4	3
4AU	C	1	0		13JL	UT	4	1		27A	UT	4	2
4AU	C	1	0		13JL	UT	4	0		27A	UT	4	2
4AU	C	1	0		13JL	UT	4	0		27A	UT	4	2
4AU	C	1	0		13JL	UT	4	0		27A	UT	4	3
4AU	C	1	0		13JL	UT	4	1		27A	UT	4	3
4AU	C	1	0		13JL	C	1	0		27A	UT	4	3
4AU	C	1	0		13JL	C	1	0		27A	UT	4	3
4AU	C	2	0		13JL	C	1	0		27A	C	1	2
4AU	C	2	1		13JL	C	1	0		27A	C	1	3
4AU	C	2	1		13JL	C	1	0		27A	C	1	3
4AU	C	2	1		13JL	C	1	0		27A	C	1	1
4AU	C	2	1		13JL	C	1	0		27A	C	1	3
4AU	C	2	0		13JL	C	1	0		27A	C	1	3
4AU	C	2	0		13JL	C	1	0		27A	C	1	3
4AU	C	2	0		13JL	C	1	0		27A	C	1	3
4AU	C	2	0		13JL	C	2	0		27A	C	1	1
4AU	C	2	0		13JL	C	2	0		27A	C	1	2
4AU	C	3	1		13JL	C	2	0		27A	C	2	3
4AU	C	3	0		13JL	C	2	0		27A	C	2	3
4AU	C	3	0		13JL	C	2	0		27A	C	2	3
4AU	C	3	0		13JL	C	2	0		27A	C	2	3
4AU	C	3	0		13JL	C	2	0		27A	C	2	2
4AU	C	3	0		13JL	C	2	0		27A	C	2	3
4AU	C	3	0		13JL	C	2	0		27A	C	2	3
4AU	C	3	0		13JL	C	2	0		27A	C	2	3
4AU	C	3	0		13JL	C	3	0		27A	C	2	2
4AU	C	3	0		13JL	C	3	0		27A	C	2	2
4AU	C	4	0		13JL	C	3	0		27A	C	3	3
4AU	C	4	0		13JL	C	3	0		27A	C	3	3
4AU	C	4	0		13JL	C	3	0		27A	C	3	3
4AU	C	4	0		13JL	C	3	0		27A	C	3	3
4AU	C	4	0		13JL	C	3	0		27A	C	3	3
4AU	C	4	0		13JL	C	4	0		27A	C	3	1
4AU	C	4	0		13JL	C	4	0		27A	C	3	1
4AU	C	4	0		13JL	C	4	1		27A	C	3	1
4AU	C	4	0		13JL	T	1	0		27A	C	3	1
4AU	C	4	0		13JL	T	1	0		27A	C	3	2
4AU	T	1	0		13JL	T	1	0		27A	C	4	3
4AU	T	1	0		13JL	T	1	0		27A	C	4	3
4AU	T	1	0		13JL	T	1	0		27A	C	4	3
4AU	T	1	0		13JL	T	1	0		27A	C	4	3
4AU	T	1	0		13JL	T	1	0		27A	C	4	3
4AU	T	1	0		13JL	T	1	0		27A	C	4	3
4AU	T	1	0		13JL	T	1	0		27A	C	4	3
4AU	T	1	0		13JL	T	1	0		27A	C	4	3
4AU	T	1	0		13JL	T	2	1		27A	C	4	3
4AU	T	1	0		13JL	T	2	0		27A	C	4	3
4AU	T	2	0		13JL	T	2	0		27A	T	1	3
4AU	T	2	0		13JL	T	2	0		27A	T	1	3
4AU	T	2	0		13JL	T	2	0		27A	T	1	3
4AU	T	2	0		13JL	T	2	0		27A	T	1	3
4AU	T	2	0		13JL	T	2	0		27A	T	1	3
4AU	T	2	0		13JL	T	2	0		27A	T	1	3
4AU	T	2	0		13JL	T	2	1		27A	T	1	3
4AU	T	2	0		13JL	T	2	0		27A	T	1	3
4AU	T	2	0		13JL	T	3	0		27A	T	1	3
4AU	T	2	0		13JL	T	3	0		27A	T	1	3
4AU	T	3	0		13JL	T	3	0		27A	T	2	3
4AU	T	3	0		13JL	T	3	0		27A	T	2	3
4AU	T	3	0		13JL	T	3	0		27A	T	2	1
4AU	T	3	0		13JL	T	3	0		27A	T	2	2
4AU	T	3	0		13JL	T	3	0		27A	T	2	3
4AU	T	3	0		13JL	T	3	0		27A	T	2	3
4AU	T	3	0		13JL	T	3	0		27A	T	2	2
4AU	T	3	0		13JL	T	3	0		27A	T	2	1
4AU	T	3	0		13JL	T	4	0		27A	T	2	3
4AU	T	3	0		13JL	T	4	0		27A	T	2	2
4AU	T	4	0		13JL	T	4	0		27A	T	3	2
4AU	T	4	1		13JL	T	4	0		27A	T	3	3
4AU	T	4	0		13JL	T	4	0		27A	T	3	3
4AU	T	4	0		13JL	T	4	0		27A	T	3	2
4AU	T	4	0		13JL	T	4	0		27A	T	3	2
4AU	T	4	0		13JL	T	4	0		27A	T	3	3
4AU	T	4	0		13JL	T	4	0		27A	T	3	2
4AU	T	4	0		13JL	T	4	0		27A	T	3	3
4AU	T	4	0		20JL	A	1	0		27A	T	3	1
4AU	T	4	0		20JL	A	1	1		27A	T	4	3
10AU	A	1	0		20JL	A	1	0		27A	T	4	3
10AU	A	1	0		20JL	A	1	0		27A	T	4	3
10AU	A	1	0		20JL	A	1	0		27A	T	4	3
10AU	A	1	0		20JL	A	1	0		27A	T	4	1
10AU	A	1	0		20JL	A	1	0		27A	T	4	3
10AU	A	1	0		20JL	A	1	0		27A	T	4	3
10AU	A	1	0		20JL	A	1	0		27A	T	4	1
10AU	A	1	0		20JL	A	1	0		27A	T	4	3
10AU	A	1	0		20JL	A	2	0		27A	T	4	3
10AU	A	1	0		20JL	A	2	0		5MA	A	1	0
10AU	A	2	0		20JL	A	2	0		5MA	A	1	0
10AU	A	2	0		20JL	A	2	0		5MA	A	1	0
10AU	A	2	0		20JL	A	2	0		5MA	A	1	0
10AU	A	2	0		20JL	A	2	0		5MA	A	1	0
10AU	A	2	0		20JL	A	2	0		5MA	A	1	0
10AU	A	2	0		20JL	A	2	0		5MA	A	1	0
10AU	A	2	0		20JL	A	2	0		5MA	A	1	0
10AU	A	2	0		20JL	A	2	0		5MA	A	1	0
10AU	A	2	0		20JL	A	3	0		5MA	A	1	0
10AU	A	2	0		20JL	A	3	0		5MA	A	2	0
10AU	A	3	1		20JL	A	3	0		5MA	A	2	1
10AU	A	3	0		20JL	A	3	0		5MA	A	2	3
10AU	A	3	0		20JL	A	3	0		5MA	A	2	3
10AU	A	3	0		20JL	A	3	0		5MA	A	2	3
10AU	A	3	0		20JL	A	3	0		5MA	A	2	3
10AU	A	3	0		20JL	A	3	0		5MA	A	2	3
10AU	A	3	0		20JL	A	3	0		5MA	A	2	2
10AU	A	3	0		20JL	A	3	0		5MA	A	2	2
10AU	A	3	0		20JL	A	4	0		5MA	A	2	1
10AU	A	3	0		20JL	A	4	0		5MA	A	3	1
10AU	A	4	0		20JL	A	4	0		5MA	A	3	1
10AU	A	4	0		20JL	A	4	0		5MA	A	3	2
10AU	A	4	0		20JL	A	4	1		5MA	A	3	1
10AU	A	4	0		20JL	A	4	2		5MA	A	3	1
10AU	A	4	0		20JL	A	4	0		5MA	A	3	2
10AU	A	4	0		20JL	A	4	0		5MA	A	3	1
10AU	A	4	0		20JL	A	4	0		5MA	A	3	1
10AU	A	4	0		20JL	A	4	0		5MA	A	3	1
10AU	A	4	0		20JL	B	1	0		5MA	A	3	0
10AU	A	4	0		20JL	B	1	0		5MA	A	4	0
10AU	B	1	0		20JL	B	1	1		5MA	A	4	0
10AU	B	1	0		20JL	B	1	0		5MA	A	4	0
10AU	B	1	0		20JL	B	1	1		5MA	A	4	0
10AU	B	1	0		20JL	B	1	1		5MA	A	4	0
10AU	B	1	0		20JL	B	1	1		5MA	A	4	0
10AU	B	1	0		20JL	B	1	0		5MA	A	4	0
10AU	B	1	0		20JL	B	1	1		5MA	A	4	0
10AU	B	1	0		20JL	B	1	1		5MA	A	4	0
10AU	B	1	0		20JL	B	2	0		5MA	A	4	0
10AU	B	1	0		20JL	B	2	0		5MA	B	1	1
10AU	B	2	1		20JL	B	2	2		5MA	B	1	0
10AU	B	2	0		20JL	B	2	1		5MA	B	1	1
10AU	B	2	0		20JL	B	2	1		5MA	B	1	1
10AU	B	2	0		20JL	B	2	0		5MA	B	1	0
10AU	B	2	0		20JL	B	2	0		5MA	B	1	1
10AU	B	2	0		20JL	B	2	1		5MA	B	1	1
10AU	B	2	0		20JL	B	2	0		5MA	B	1	0
10AU	B	2	0		20JL	B	2	0		5MA	B	1	2
10AU	B	2	0		20JL	B	3	1		5MA	B	1	0
10AU	B	2	0		20JL	B	3	0		5MA	B	2	3
10AU	B	3	1		20JL	B	3	0		5MA	B	2	2
10AU	B	3	0		20JL	B	3	1		5MA	B	2	2
10AU	B	3	0		20JL	B	3	0		5MA	B	2	3
10AU	B	3	0		20JL	B	3	1		5MA	B	2	2
10AU	B	3	0		20JL	B	3	1		5MA	B	2	3
10AU	B	3	0		20JL	B	3	0		5MA	B	2	3
10AU	B	3	0		20JL	B	3	1		5MA	B	2	3
10AU	B	3	0		20JL	B	3	0		5MA	B	2	3
10AU	B	3	0		20JL	B	4	0		5MA	B	2	3
10AU	B	3	0		20JL	B	4	0		5MA	B	3	1
10AU	B	4	1		20JL	B	4	0		5MA	B	3	0
10AU	B	4	0		20JL	B	4	0		5MA	B	3	0
10AU	B	4	0		20JL	B	4	1		5MA	B	3	0
10AU	B	4	0		20JL	B	4	1		5MA	B	3	0
10AU	B	4	0		20JL	B	4	0		5MA	B	3	0
10AU	B	4	0		20JL	B	4	0		5MA	B	3	0
10AU	B	4	0		20JL	B	4	1		5MA	B	3	0
10AU	B	4	0		20JL	B	4	0		5MA	B	3	0
10AU	B	4	0		20JL	UT	1	0		5MA	B	3	1
10AU	B	4	0		20JL	UT	1	1		5MA	B	4	0
10AU	UT	1	1		20JL	UT	1	0		5MA	B	4	0
10AU	UT	1	1		20JL	UT	1	2		5MA	B	4	0
10AU	UT	1	0		20JL	UT	1	1		5MA	B	4	0
10AU	UT	1	0		20JL	UT	1	1		5MA	B	4	0
10AU	UT	1	0		20JL	UT	1	1		5MA	B	4	0
10AU	UT	1	0		20JL	UT	1	1		5MA	B	4	0
10AU	UT	1	0		20JL	UT	1	0		5MA	B	4	0
10AU	UT	1	0		20JL	UT	1	0		5MA	B	4	0
10AU	UT	1	0		20JL	UT	2	0		5MA	UT	1	0
10AU	UT	1	0		20JL	UT	2	0		5MA	UT	1	1
10AU	UT	2	2		20JL	UT	2	0		5MA	UT	1	0
10AU	UT	2	1		20JL	UT	2	1		5MA	UT	1	0
10AU	UT	2	2		20JL	UT	2	0		5MA	UT	1	0
10AU	UT	2	1		20JL	UT	2	0		5MA	UT	1	0
10AU	UT	2	0		20JL	UT	2	0		5MA	UT	2	0
10AU	UT	2	0		20JL	UT	2	1		5MA	UT	2	0
10AU	UT	2	0		20JL	UT	2	1		5MA	UT	2	1
10AU	UT	2	0		20JL	UT	2	1		5MA	UT	2	0
10AU	UT	2	0		20JL	UT	3	0		5MA	UT	2	1
10AU	UT	2	0		20JL	UT	3	1		5MA	UT	2	0
10AU	UT	3	1		20JL	UT	3	0		5MA	UT	2	1
10AU	UT	3	0		20JL	UT	3	2		5MA	UT	2	0
10AU	UT	3	2		20JL	UT	3	1		5MA	UT	2	0
10AU	UT	3	2		20JL	UT	3	0		5MA	UT	2	3
10AU	UT	3	0		20JL	UT	3	1		5MA	UT	3	1
10AU	UT	3	0		20JL	UT	3	2		5MA	UT	3	1
10AU	UT	3	0		20JL	UT	3	0		5MA	UT	3	3
10AU	UT	3	0		20JL	UT	3	0		5MA	UT	3	1
10AU	UT	3	0		20JL	UT	4	0		5MA	UT	3	2
10AU	UT	3	0		20JL	UT	4	2		5MA	UT	3	3
10AU	UT	4	1		20JL	UT	4	1		5MA	UT	3	3
10AU	UT	4	1		20JL	UT	4	1		5MA	UT	3	3
10AU	UT	4	1		20JL	UT	4	1		5MA	UT	3	3
10AU	UT	4	1		20JL	UT	4	1		5MA	UT	4	1
10AU	UT	4	1		20JL	UT	4	0		5MA	UT	4	1
10AU	UT	4	1		20JL	UT	4	3		5MA	UT	4	1
10AU	UT	4	0		20JL	UT	4	0		5MA	UT	4	0
10AU	UT	4	0		20JL	UT	4	1		5MA	UT	4	1
10AU	UT	4	0		20JL	C	1	0		5MA	UT	4	2
10AU	UT	4	0		20JL	C	1	0		5MA	UT	4	0
10AU	C	1	0		20JL	C	1	0		5MA	UT	4	0
10AU	C	1	0		20JL	C	1	0		5MA	UT	4	2
10AU	C	1	0		20JL	C	1	2		5MA	UT	4	1
10AU	C	1	0		20JL	C	1	0		5MA	C	1	1
10AU	C	1	0		20JL	C	1	1		5MA	C	2	0
10AU	C	1	0		20JL	C	1	0		5MA	C	2	0
10AU	C	1	0		20JL	C	1	0		5MA	C	2	1
10AU	C	1	0		20JL	C	1	0		5MA	C	2	1
10AU	C	1	0		20JL	C	2	1		5MA	C	2	1
10AU	C	1	0		20JL	C	2	0		5MA	C	2	0
10AU	C	2	0		20JL	C	2	1		5MA	C	2	0
10AU	C	2	0		20JL	C	2	1		5MA	C	2	2
10AU	C	2	0		20JL	C	2	0		5MA	C	2	0
10AU	C	2	0		20JL	C	2	0		5MA	C	2	0
10AU	C	2	0		20JL	C	2	3		5MA	C	3	0
10AU	C	2	0		20JL	C	2	0		5MA	C	3	0
10AU	C	2	0		20JL	C	2	0		5MA	C	3	1
10AU	C	2	0		20JL	C	2	0		5MA	C	3	0
10AU	C	2	0		20JL	C	3	0		5MA	C	3	0
10AU	C	2	0		20JL	C	3	0		5MA	C	3	0
10AU	C	3	0		20JL	C	3	0		5MA	C	3	1
10AU	C	3	0		20JL	C	3	0		5MA	C	3	0
10AU	C	3	0		20JL	C	3	0		5MA	C	3	0
10AU	C	3	0		20JL	C	3	0		5MA	C	3	0
10AU	C	3	0		20JL	C	3	0		5MA	C	4	3
10AU	C	3	0		20JL	C	3	0		5MA	C	4	1
10AU	C	3	0		20JL	C	3	0		5MA	C	4	0
10AU	C	3	0		20JL	C	3	0		5MA	C	4	1
10AU	C	3	0		20JL	C	4	2		5MA	C	4	0
10AU	C	3	0		20JL	C	4	3		5MA	C	4	0
10AU	C	4	0		20JL	C	4	0		5MA	C	4	2
10AU	C	4	0		20JL	C	4	0		5MA	C	4	0
10AU	C	4	0		20JL	C	4	0		5MA	T	1	2
10AU	C	4	0		20JL	C	4	0		5MA	T	1	1
10AU	C	4	0		20JL	C	4	0		5MA	T	1	2
10AU	C	4	0		20JL	C	4	0		5MA	T	1	3
10AU	C	4	0		20JL	C	4	0		5MA	T	1	2
10AU	C	4	0		20JL	C	4	0		5MA	T	1	2
10AU	C	4	0		20JL	T	1	0		5MA	T	1	3
10AU	C	4	0		20JL	T	1	0		5MA	T	1	3
10AU	T	1	1		20JL	T	1	1		5MA	T	1	2
10AU	T	1	1		20JL	T	1	0		5MA	T	1	3
10AU	T	1	0		20JL	T	1	0		5MA	T	2	3
10AU	T	1	1		20JL	T	1	0		5MA	T	2	3
10AU	T	1	0		20JL	T	1	1		5MA	T	2	2
10AU	T	1	0		20JL	T	1	0		5MA	T	2	3
10AU	T	1	0		20JL	T	1	0		5MA	T	2	3
10AU	T	1	0		20JL	T	1	0		5MA	T	2	3
10AU	T	1	0		20JL	T	2	0		5MA	T	2	3
10AU	T	1	0		20JL	T	2	0		5MA	T	2	3
10AU	T	2	0		20JL	T	2	0		5MA	T	2	3
10AU	T	2	0		20JL	T	2	3		5MA	T	2	3
10AU	T	2	0		20JL	T	2	1		5MA	T	3	0
10AU	T	2	0		20JL	T	2	0		5MA	T	3	0
10AU	T	2	0		20JL	T	2	0		5MA	T	4	0
10AU	T	2	0		20JL	T	2	0		5MA	T	4	0
10AU	T	2	0		20JL	T	2	0		5MA	T	4	0
10AU	T	2	0		20JL	T	2	0		5MA	T	4	0
10AU	T	2	0		20JL	T	3	0		5MA	T	4	0
10AU	T	2	0		20JL	T	3	0		12MA	A	1	0
10AU	T	3	1		20JL	T	3	0		12MA	A	1	0
10AU	T	3	0		20JL	T	3	0		12MA	A	1	2
10AU	T	3	0		20JL	T	3	0		12MA	A	1	3
10AU	T	3	0		20JL	T	3	0		12MA	A	1	0
10AU	T	3	0		20JL	T	3	0		12MA	A	2	0
10AU	T	3	0		20JL	T	3	0		12MA	A	2	0
10AU	T	3	0		20JL	T	3	0		12MA	A	2	1
10AU	T	3	0		20JL	T	3	0		12MA	A	2	1
10AU	T	3	0		20JL	T	4	0		12MA	A	2	0
10AU	T	3	0		20JL	T	4	0		12MA	A	2	2
10AU	T	4	1		20JL	T	4	0		12MA	A	2	0
10AU	T	4	0		20JL	T	4	1		12MA	A	2	0
10AU	T	4	0		20JL	T	4	0		12MA	A	2	0
10AU	T	4	0		20JL	T	4	0		12MA	A	2	0
10AU	T	4	0		20JL	T	4	1		12MA	A	3	1
10AU	T	4	0		20JL	T	4	1		12MA	A	3	0
10AU	T	4	0		20JL	T	4	0		12MA	A	3	1
10AU	T	4	0		20JL	T	4	1		12MA	A	3	0
10AU	T	4	0		4AU	A	1	0		12MA	A	3	1
10AU	T	4	0		4AU	A	1	0		12MA	A	3	0
17AU	A	1	1		4AU	A	1	0		12MA	A	3	0
17AU	A	1	1		4AU	A	1	0		12MA	A	3	3
17AU	A	1	0		4AU	A	1	0		12MA	A	3	0
17AU	A	1	0		4AU	A	1	0		12MA	A	3	0
17AU	A	1	0		4AU	A	1	0		12MA	A	4	0
17AU	A	1	0		4AU	A	1	0		12MA	A	4	0
17AU	A	1	0		4AU	A	1	0		12MA	A	4	1
17AU	A	1	0		4AU	A	1	0		12MA	A	4	3
17AU	A	1	0		4AU	A	2	1		12MA	A	4	2
17AU	A	1	0		4AU	A	2	0		12MA	A	4	1
17AU	A	2	1		4AU	A	2	0		12MA	A	4	1
17AU	A	2	1		4AU	A	2	0		12MA	A	4	2
17AU	A	2	0		4AU	A	2	0		12MA	A	4	0
17AU	A	2	0		4AU	A	2	0		12MA	B	1	1
17AU	A	2	0		4AU	A	3	2		12MA	B	1	1
17AU	A	2	0		4AU	A	3	1		12MA	B	1	1
17AU	A	2	0		4AU	A	3	0		12MA	B	1	1
17AU	A	2	0		4AU	A	3	0		12MA	B	1	0
17AU	A	2	0		4AU	A	3	0		12MA	B	1	1
17AU	A	2	0		4AU	A	3	0		12MA	B	2	1
17AU	A	3	0		4AU	A	3	0		12MA	B	2	0
17AU	A	3	0		4AU	A	3	0		12MA	B	2	3
17AU	A	3	0		4AU	A	4	0		12MA	B	2	3
17AU	A	3	0		4AU	A	4	0		12MA	B	2	2
17AU	A	3	0		4AU	A	4	0		12MA	B	2	3
17AU	A	3	0		4AU	A	4	0		12MA	B	2	3
17AU	A	3	0		4AU	A	4	0		12MA	B	2	0
17AU	A	3	0		4AU	A	4	0		12MA	B	2	0
17AU	A	3	0		4AU	A	4	0		12MA	B	2	1
17AU	A	3	0		4AU	A	4	0		12MA	B	3	0
17AU	A	4	1		4AU	A	4	0		12MA	B	3	0
17AU	A	4	0		4AU	A	4	0		12MA	B	3	0
17AU	A	4	0		4AU	B	1	1		12MA	B	3	0
17AU	A	4	0		4AU	B	1	0		12MA	B	3	1
17AU	A	4	0		4AU	B	1	0		12MA	B	3	0
17AU	A	4	0		4AU	B	1	0		12MA	B	3	0
17AU	A	4	0		4AU	B	1	0		12MA	B	3	0
17AU	A	4	0		4AU	B	1	0		12MA	B	3	0
17AU	A	4	0		4AU	B	1	0		12MA	B	3	0
17AU	A	4	0		4AU	B	1	0		12MA	B	4	1
17AU	B	1	0		4AU	B	1	0		12MA	B	4	0
17AU	B	1	0		4AU	B	1	0		12MA	B	4	0
17AU	B	1	0		4AU	B	2	1		12MA	B	4	3
17AU	B	1	0		4AU	B	2	0		12MA	B	4	3
17AU	B	1	0		4AU	B	2	0		12MA	UT	1	2
17AU	B	1	0		4AU	B	2	0		12MA	UT	1	2
17AU	B	1	0		4AU	B	2	0		12MA	UT	1	0
17AU	B	1	0		4AU	B	2	0		12MA	UT	1	1
17AU	B	1	0		4AU	B	2	0		12MA	UT	1	1
17AU	B	1	0		4AU	B	2	0		12MA	UT	1	0
17AU	B	2	1		4AU	B	2	0		12MA	UT	1	0
17AU	B	2	1		4AU	B	2	0		12MA	UT	1	0
17AU	B	2	1		4AU	B	3	1		12MA	UT	1	0
17AU	B	2	1		4AU	B	3	0		12MA	UT	1	1
17AU	B	2	1		4AU	B	3	0		12MA	UT	2	1
17AU	B	2	1		4AU	B	3	0		12MA	UT	2	1
17AU	B	2	0		4AU	B	3	0		12MA	UT	2	3
17AU	B	2	0		4AU	B	3	0		12MA	UT	2	0
17AU	B	2	0		4AU	B	3	0		12MA	UT	2	1
17AU	B	2	0		4AU	B	3	0		12MA	UT	2	1
17AU	B	3	2		4AU	B	3	0		12MA	UT	2	0
17AU	B	3	1		4AU	B	3	0		12MA	UT	2	0
17AU	B	3	0		4AU	B	4	1		12MA	UT	2	0
17AU	B	3	0		4AU	B	4	0		12MA	UT	3	0
17AU	B	3	0		4AU	B	4	0		12MA	UT	3	0
17AU	B	3	0		4AU	B	4	0		12MA	UT	3	0
17AU	B	3	0		4AU	B	4	0		12MA	UT	3	0
17AU	B	3	0		4AU	B	4	0		12MA	UT	3	3
17AU	B	3	0		4AU	B	4	0		12MA	UT	3	1
17AU	B	3	0		4AU	B	4	0		12MA	UT	3	3
17AU	B	4	0		4AU	B	4	0		12MA	UT	4	3
17AU	B	4	0		4AU	B	4	0		12MA	UT	4	2
17AU	B	4	0		4AU	UT	1	0		12MA	UT	4	1
17AU	B	4	0		4AU	UT	1	1		12MA	UT	4	3
17AU	B	4	0		4AU	UT	1	1		12MA	UT	4	3
17AU	B	4	0		4AU	UT	1	1		12MA	UT	4	3
17AU	B	4	0		4AU	UT	1	2		12MA	UT	4	3
17AU	B	4	0		4AU	UT	1	1		12MA	UT	4	2
17AU	B	4	0		4AU	UT	1	1		12MA	C	1	2
17AU	B	4	0		4AU	UT	2	2		12MA	C	1	3
17AU	UT	1	3		4AU	UT	2	1		12MA	C	1	0
17AU	UT	1	2		4AU	UT	2	1		12MA	C	1	2
17AU	UT	1	3		4AU	UT	2	1		12MA	C	1	2
17AU	UT	1	2		4AU	UT	2	1		12MA	C	1	3
17AU	UT	1	1		4AU	UT	2	3		12MA	C	2	2
17AU	UT	1	0		4AU	UT	2	0		12MA	C	2	1
17AU	UT	1	0		4AU	UT	2	2		12MA	C	2	3
17AU	UT	1	0		4AU	UT	2	0		12MA	C	2	3
17AU	UT	1	0		4AU	UT	2	0		12MA	C	2	3
17AU	UT	1	0		4AU	UT	3	0		12MA	C	2	2
17AU	UT	2	1		4AU	UT	3	0		12MA	C	2	0
17AU	UT	2	6		4AU	UT	3	0		12MA	C	2	0
17AU	UT	2	3		4AU	UT	3	0		12MA	C	2	0
17AU	UT	2	1		4AU	UT	3	2		12MA	C	3	2
17AU	UT	2	2		4AU	UT	3	2		12MA	C	3	0
17AU	UT	2	0		4AU	UT	3	1		12MA	C	3	0
17AU	UT	2	0		4AU	UT	3	2		12MA	C	3	1
17AU	UT	2	0		4AU	UT	3	0		12MA	C	4	1
17AU	UT	2	5		4AU	UT	3	0		12MA	C	4	3
17AU	UT	2	4		4AU	UT	4	0		12MA	C	4	0
17AU	UT	3	3		4AU	UT	4	1		12MA	C	4	0
17AU	UT	3	1		4AU	UT	4	0		12MA	T	1	3
17AU	UT	3	2		4AU	UT	4	0		12MA	T	1	3
17AU	UT	3	2		4AU	UT	4	3		12MA	T	1	1
17AU	UT	3	2		4AU	UT	4	0		12MA	T	1	3
17AU	UT	3	1		4AU	UT	4	0		12MA	T	1	1
17AU	UT	3	1		4AU	UT	4	0		12MA	T	1	2
17AU	UT	3	1		4AU	UT	4	0		12MA	T	1	2
17AU	UT	3	1		4AU	UT	4	0		12MA	T	1	2
17AU	UT	3	0		4AU	C	1	0		12MA	T	1	0
17AU	UT	4	1		4AU	C	1	0		12MA	T	2	1
17AU	UT	4	0		4AU	C	1	0		12MA	T	2	2
17AU	UT	4	0		4AU	C	1	0		12MA	T	2	3
17AU	UT	4	0		4AU	C	1	0		12MA	T	2	3
17AU	UT	4	0		4AU	C	1	0		12MA	T	2	3
17AU	UT	4	0		4AU	C	1	0		12MA	T	2	3
17AU	UT	4	0		4AU	C	1	0		12MA	T	2	1
17AU	UT	4	0		4AU	C	1	1		12MA	T	2	0
17AU	UT	4	0		4AU	C	1	0		12MA	T	3	0
17AU	UT	4	0		4AU	C	2	0		12MA	T	3	0
17AU	C	1	1		4AU	C	2	1		19MA	A	1	0
17AU	C	1	1		4AU	C	2	0		19MA	A	1	1
17AU	C	1	1		4AU	C	2	0		19MA	A	1	1
17AU	C	1	0		4AU	C	2	0		19MA	A	1	1
17AU	C	1	0		4AU	C	2	0		19MA	A	1	3
17AU	C	1	0		4AU	C	2	0		19MA	A	1	3
17AU	C	1	0		4AU	C	2	0		19MA	A	1	1
17AU	C	1	0		4AU	C	2	0		19MA	A	1	2
17AU	C	1	0		4AU	C	2	0		19MA	A	1	1
17AU	C	1	0		4AU	C	3	0		19MA	A	1	2
17AU	C	2	1		4AU	C	3	0		19MA	A	2	2
17AU	C	2	1		4AU	C	3	0		19MA	A	2	1
17AU	C	2	2		4AU	C	3	0		19MA	A	2	1
17AU	C	2	2		4AU	C	3	0		19MA	A	2	3
17AU	C	2	0		4AU	C	3	0		19MA	A	2	2
17AU	C	2	0		4AU	C	3	0		19MA	A	2	2
17AU	C	2	0		4AU	C	3	0		19MA	A	2	3
17AU	C	2	0		4AU	C	3	0		19MA	A	2	2
17AU	C	2	0		4AU	C	3	0		19MA	A	2	3
17AU	C	2	0		4AU	C	4	1		19MA	A	2	3
17AU	C	3	0		4AU	C	4	1		19MA	A	3	1
17AU	C	3	0		4AU	C	4	1		19MA	B	1	3
17AU	C	3	0		4AU	C	4	0		19MA	B	1	3
17AU	C	3	0		4AU	C	4	0		19MA	B	1	3
17AU	C	3	0		4AU	C	4	0		19MA	B	1	3
17AU	C	3	0		4AU	C	4	0		19MA	B	1	3
17AU	C	3	0		4AU	C	4	0		19MA	B	1	2
17AU	C	3	0		4AU	C	4	0		19MA	B	1	3
17AU	C	3	0		4AU	C	4	0		19MA	B	1	3
17AU	C	3	0		4AU	T	1	1		19MA	B	1	1
17AU	C	4	0		4AU	T	1	1		19MA	B	1	1
17AU	C	4	0		4AU	T	1	0		19MA	B	2	3
17AU	C	4	0		4AU	T	1	0		19MA	B	2	3
17AU	C	4	0		4AU	T	1	0		19MA	B	2	3
17AU	C	4	0		4AU	T	1	0		19MA	B	2	3
17AU	C	4	0		4AU	T	1	0		19MA	B	2	3
17AU	C	4	0		4AU	T	1	0		19MA	B	2	3
17AU	C	4	0		4AU	T	1	0		19MA	B	2	2
17AU	C	4	0		4AU	T	1	0		19MA	B	2	2
17AU	C	4	0		4AU	T	2	0		19MA	B	2	3
17AU	T	1	2		4AU	T	2	0		19MA	B	2	1
17AU	T	1	1		4AU	T	2	0		19MA	B	3	3
17AU	T	1	0		4AU	T	2	0		19MA	B	3	0
17AU	T	1	0		4AU	T	2	0		19MA	B	3	3
17AU	T	1	0		4AU	T	2	0		19MA	B	3	3
17AU	T	1	0		4AU	T	2	0		19MA	B	3	2
17AU	T	1	0		4AU	T	2	0		19MA	B	3	3
17AU	T	1	0		4AU	T	2	0		19MA	B	3	1
17AU	T	1	0		4AU	T	2	0		19MA	B	3	2
17AU	T	1	0		4AU	T	3	0		19MA	UT	1	0
17AU	T	2	1		4AU	T	3	0		19MA	UT	1	0
17AU	T	2	2		4AU	T	3	0		19MA	UT	1	1
17AU	T	2	1		4AU	T	3	0		19MA	UT	1	0
17AU	T	2	1		4AU	T	3	0		19MA	UT	1	0
17AU	T	2	1		4AU	T	3	0		19MA	UT	1	0
17AU	T	2	1		4AU	T	3	0		19MA	UT	1	0
17AU	T	2	0		4AU	T	3	0		19MA	UT	1	0
17AU	T	2	0		4AU	T	3	0		19MA	UT	1	0
17AU	T	2	0		4AU	T	3	0		19MA	UT	1	2
17AU	T	2	0		4AU	T	4	0		19MA	UT	2	2
17AU	T	3	0		4AU	T	4	0		19MA	UT	2	3
17AU	T	3	0		4AU	T	4	0		19MA	UT	2	3
17AU	T	3	0		4AU	T	4	0		19MA	UT	2	3
17AU	T	3	0		4AU	T	4	0		19MA	UT	2	3
17AU	T	3	0		4AU	T	4	0		19MA	UT	2	3
17AU	T	3	0		4AU	T	4	0		19MA	UT	2	3
17AU	T	3	0		4AU	T	4	0		19MA	UT	2	2
17AU	T	3	0		4AU	T	4	0		19MA	UT	2	2
17AU	T	3	0		4AU	T	4	0		19MA	UT	2	1
17AU	T	3	0		10AU	A	1	0		19MA	UT	3	1
17AU	T	4	1		10AU	A	1	0		19MA	UT	3	0
17AU	T	4	0		10AU	A	1	0		19MA	UT	3	0
17AU	T	4	0		10AU	A	1	0		19MA	UT	4	3
17AU	T	4	0		10AU	A	1	0		19MA	UT	4	1
17AU	T	4	0		10AU	A	1	0		19MA	UT	4	3
17AU	T	4	0		10AU	A	1	0		19MA	UT	4	3
17AU	T	4	0		10AU	A	1	0		19MA	UT	4	3
17AU	T	4	0		10AU	A	1	0		19MA	UT	4	1
17AU	T	4	0		10AU	A	2	0		19MA	UT	4	1
17AU	T	4	0		10AU	A	2	0		19MA	UT	4	3
24AU	A	1	1		10AU	A	2	0		19MA	UT	4	3
24AU	A	1	1		10AU	A	2	0		19MA	UT	4	3
24AU	A	1	1		10AU	A	2	0		19MA	C	1	3
24AU	A	1	0		10AU	A	2	0		19MA	C	1	3
24AU	A	1	0		10AU	A	2	0		19MA	C	1	3
24AU	A	1	0		10AU	A	2	0		19MA	C	1	3
24AU	A	1	0		10AU	A	2	0		19MA	C	1	3
24AU	A	1	0		10AU	A	2	0		19MA	C	1	3
24AU	A	1	0		10AU	A	3	0		19MA	C	1	3
24AU	A	1	0		10AU	A	3	0		19MA	C	1	3
24AU	A	2	1		10AU	A	3	1		19MA	C	1	1
24AU	A	2	0		10AU	A	3	0		19MA	C	1	3
24AU	A	2	0		10AU	A	3	0		19MA	C	2	1
24AU	A	2	0		10AU	A	3	0		19MA	C	2	3
24AU	A	2	0		10AU	A	3	0		19MA	C	2	1
24AU	A	2	0		10AU	A	3	0		19MA	C	2	2
24AU	A	2	0		10AU	A	3	0		19MA	C	3	2
24AU	A	2	0		10AU	A	3	0		19MA	C	3	3
24AU	A	2	0		10AU	A	4	0		19MA	C	3	1
24AU	A	2	0		10AU	A	4	0		19MA	C	3	3
24AU	B	1	0		10AU	A	4	1		19MA	C	3	2
24AU	B	1	0		10AU	A	4	0		19MA	C	3	2
24AU	B	1	0		10AU	A	4	0		19MA	C	3	3
24AU	B	1	0		10AU	A	4	0		19MA	C	3	3
24AU	B	1	0		10AU	A	4	0		19MA	C	3	2
24AU	B	1	0		10AU	A	4	0		19MA	C	3	3
24AU	B	1	0		10AU	A	4	0		19MA	C	4	3
24AU	B	1	0		10AU	A	4	0		19MA	C	4	2
24AU	B	1	0		10AU	B	1	0		19MA	C	4	3
24AU	B	1	0		10AU	B	1	0		19MA	C	4	3
24AU	B	2	1		10AU	B	1	0		19MA	C	4	0
24AU	B	2	1		10AU	B	1	0		19MA	C	4	0
24AU	B	2	0		10AU	B	1	0		19MA	C	4	0
24AU	B	2	0		10AU	B	1	0		19MA	C	4	3
24AU	B	2	0		10AU	B	1	0		19MA	C	4	0
24AU	B	2	0		10AU	B	1	0		19MA	C	4	0
24AU	B	2	0		10AU	B	1	0		19MA	T	1	3
24AU	B	2	0		10AU	B	1	0		19MA	T	1	1
24AU	B	2	0		10AU	B	2	1		19MA	T	1	3
24AU	B	2	0		10AU	B	2	2		19MA	T	1	2
24AU	UT	1	0		10AU	B	2	0		19MA	T	1	2
24AU	UT	1	0		10AU	B	2	0		19MA	T	1	2
24AU	UT	1	0		10AU	B	2	0		19MA	T	1	3
24AU	UT	1	0		10AU	B	2	0		19MA	T	1	2
24AU	UT	1	0		10AU	B	2	0		19MA	T	1	3
24AU	UT	1	1		10AU	B	2	0		19MA	T	1	3
24AU	UT	1	1		10AU	B	2	0		19MA	T	2	3
24AU	UT	1	1		10AU	B	2	1		19MA	T	2	3
24AU	UT	1	0		10AU	B	3	1		19MA	T	2	1
24AU	UT	1	0		10AU	B	3	0		19MA	T	2	3
24AU	UT	2	1		10AU	B	3	0		19MA	T	2	2
24AU	UT	2	3		10AU	B	3	0		19MA	T	2	3
24AU	UT	2	2		10AU	B	3	0		19MA	T	2	1
24AU	UT	2	2		10AU	B	3	0		19MA	T	2	3
24AU	UT	2	2		10AU	B	3	0		19MA	T	2	3
24AU	UT	2	1		10AU	B	3	0		19MA	T	2	2
24AU	UT	2	0		10AU	B	3	0		19MA	T	3	3
24AU	UT	2	0		10AU	B	3	0		19MA	T	3	3
24AU	UT	2	0		10AU	B	4	1		19MA	T	3	1
24AU	UT	2	0		10AU	B	4	0		19MA	T	3	3
24AU	C	1	0		10AU	B	4	0		19MA	T	3	3
24AU	C	1	0		10AU	B	4	0		19MA	T	3	3
24AU	C	1	0		10AU	B	4	0		19MA	T	3	3
24AU	C	1	0		10AU	B	4	0		19MA	T	3	3
24AU	C	1	0		10AU	B	4	0		19MA	T	3	0
24AU	C	1	0		10AU	B	4	0		19MA	T	4	3
24AU	C	1	0		10AU	B	4	0		19MA	T	4	3
24AU	C	1	0		10AU	B	4	0		19MA	T	4	3
24AU	C	1	0		10AU	UT	1	1		19MA	T	4	3
24AU	C	1	0		10AU	UT	1	0		19MA	T	4	2
24AU	C	2	2		10AU	UT	1	3		19MA	T	4	3
24AU	C	2	0		10AU	UT	1	3		19MA	T	4	3
24AU	C	2	0		10AU	UT	1	1		19MA	T	4	3
24AU	C	2	0		10AU	UT	1	2		19MA	T	4	3
24AU	C	2	0		10AU	UT	1	1		19MA	T	4	2
24AU	C	2	0		10AU	UT	1	2		31MA	A	1	0
24AU	C	2	0		10AU	UT	2	1		31MA	A	1	1
24AU	C	2	0		10AU	UT	2	1		31MA	A	1	0
24AU	C	2	0		10AU	UT	2	1		31MA	A	1	1
24AU	C	2	0		10AU	UT	2	1		31MA	A	1	0
24AU	T	1	1		10AU	UT	2	0		31MA	A	1	0
24AU	T	1	1		10AU	UT	2	0		31MA	A	1	0
24AU	T	1	0		10AU	UT	2	1		31MA	A	1	1
24AU	T	1	0		10AU	UT	3	1		31MA	A	1	1
24AU	T	1	0		10AU	UT	3	0		31MA	A	1	0
24AU	T	1	0		10AU	UT	3	0		31MA	A	2	0
24AU	T	1	0		10AU	UT	3	1		31MA	A	2	0
24AU	T	1	0		10AU	UT	3	1		31MA	A	2	0
24AU	T	1	0		10AU	UT	3	1		31MA	A	2	0
24AU	T	1	0		10AU	UT	3	1		31MA	A	2	0
24AU	T	2	1		10AU	UT	3	1		31MA	A	2	1
24AU	T	2	1		10AU	UT	3	1		31MA	A	2	0
24AU	T	2	1		10AU	UT	3	1		31MA	A	2	0
24AU	T	2	0		10AU	UT	4	0		31MA	A	2	0
24AU	T	2	0		10AU	UT	4	0		31MA	A	2	0
24AU	T	2	0		10AU	UT	4	1		31MA	A	3	1
21SE	A	1	1		10AU	UT	4	1		31MA	A	3	3
21SE	A	1	0		10AU	UT	4	0		31MA	A	3	0
21SE	A	1	0		10AU	UT	4	0		31MA	A	3	0
21SE	A	1	0		10AU	UT	4	0		31MA	A	3	1
21SE	A	1	0		10AU	UT	4	1		31MA	A	3	1
21SE	A	1	0		10AU	UT	4	0		31MA	A	3	0
21SE	A	1	0		10AU	UT	4	0		31MA	A	3	1
21SE	A	1	0		10AU	C	1	0		31MA	A	3	1
21SE	A	1	0		10AU	C	1	1		31MA	A	3	0
21SE	A	1	0		10AU	C	1	0		31MA	A	4	0
21SE	A	2	1		10AU	C	1	0		31MA	A	4	0
21SE	A	2	1		10AU	C	1	0		31MA	A	4	1
21SE	A	2	0		10AU	C	1	0		31MA	A	4	0
21SE	A	2	0		10AU	C	1	0		31MA	A	4	0
21SE	A	2	0		10AU	C	1	0		31MA	A	4	0
21SE	A	2	0		10AU	C	1	0		31MA	A	4	0
21SE	A	2	0		10AU	C	1	0		31MA	A	4	0
21SE	A	2	0		10AU	C	2	0		31MA	A	4	0
21SE	A	2	0		10AU	C	2	1		31MA	A	4	0
21SE	A	2	0		10AU	C	2	0		31MA	B	1	1
21SE	A	3	1		10AU	C	2	1		31MA	B	1	2
21SE	A	3	0		10AU	C	2	0		31MA	B	1	1
21SE	A	3	0		10AU	C	2	1		31MA	B	1	2
21SE	A	3	0		10AU	C	2	0		31MA	B	1	2
21SE	A	3	0		10AU	C	2	1		31MA	B	1	1
21SE	A	3	0		10AU	C	2	0		31MA	B	1	0
21SE	A	3	0		10AU	C	2	2		31MA	B	1	1
21SE	A	3	0		10AU	C	3	0		31MA	B	1	1
21SE	A	3	0		10AU	C	3	0		31MA	B	1	2
21SE	A	3	0		10AU	C	3	0		31MA	B	2	0
21SE	A	4	1		10AU	C	3	0		31MA	B	2	1
21SE	A	4	0		10AU	C	3	0		31MA	B	2	0
21SE	A	4	1		10AU	C	3	1		31MA	B	2	1
21SE	A	4	0		10AU	C	3	1		31MA	B	2	1
21SE	A	4	0		10AU	C	3	0		31MA	B	2	3
21SE	A	4	0		10AU	C	3	0		31MA	B	2	1
21SE	A	4	0		10AU	C	3	0		31MA	B	2	0
21SE	A	4	0		10AU	C	4	1		31MA	B	2	1
21SE	A	4	0		10AU	C	4	0		31MA	B	2	1
21SE	A	4	0		10AU	C	4	0		31MA	B	3	0
21SE	B	1	5		10AU	C	4	0		31MA	B	3	0
21SE	B	1	0		10AU	C	4	1		31MA	B	3	0
21SE	B	1	0		10AU	C	4	1		31MA	B	3	1
21SE	B	1	0		10AU	C	4	1		31MA	B	3	0
21SE	B	1	0		10AU	C	4	0		31MA	B	3	0
21SE	B	1	0		10AU	C	4	1		31MA	B	3	0
21SE	B	1	0		10AU	C	4	1		31MA	B	3	0
21SE	B	1	0		10AU	T	1	0		31MA	B	3	0
21SE	B	1	0		10AU	T	1	1		31MA	B	3	0
21SE	B	1	0		10AU	T	1	0		31MA	B	4	0
21SE	B	2	1		10AU	T	1	0		31MA	B	4	0
21SE	B	2	1		10AU	T	1	0		31MA	B	4	0
21SE	B	2	0		10AU	T	1	0		31MA	B	4	0
21SE	B	2	0		10AU	T	1	0		31MA	B	4	0
21SE	B	2	0		10AU	T	1	0		31MA	B	4	1
21SE	B	2	0		10AU	T	1	0		31MA	B	4	1
21SE	B	2	0		10AU	T	1	1		31MA	B	4	0
21SE	B	2	0		10AU	T	2	0		31MA	B	4	0
21SE	B	2	0		10AU	T	2	0		31MA	B	4	0
21SE	B	2	0		10AU	T	2	1		31MA	UT	1	2
21SE	B	3	1		10AU	T	2	0		31MA	UT	1	3
21SE	B	3	1		10AU	T	2	0		31MA	UT	1	3
21SE	B	3	0		10AU	T	2	0		31MA	UT	1	3
21SE	B	3	0		10AU	T	2	0		31MA	UT	1	1
21SE	B	3	0		10AU	T	2	0		31MA	UT	1	3
21SE	B	3	0		10AU	T	2	0		31MA	UT	1	2
21SE	B	3	0		10AU	T	2	0		31MA	UT	1	3
21SE	B	3	0		10AU	T	3	1		31MA	UT	1	2
21SE	B	3	0		10AU	T	3	0		31MA	UT	1	2
21SE	B	3	0		10AU	T	3	0		31MA	UT	2	3
21SE	B	4	1		10AU	T	3	0		31MA	UT	2	3
21SE	B	4	2		10AU	T	3	0		31MA	UT	2	3
21SE	B	4	1		10AU	T	3	0		31MA	UT	2	3
21SE	B	4	1		10AU	T	3	0		31MA	UT	2	3
21SE	B	4	2		10AU	T	3	0		31MA	UT	2	3
21SE	B	4	0		10AU	T	3	0		31MA	UT	2	3
21SE	B	4	0		10AU	T	3	1		31MA	UT	2	3
21SE	B	4	0		10AU	T	4	0		31MA	UT	2	3
21SE	B	4	0		10AU	T	4	1		31MA	UT	2	3
21SE	B	4	0		10AU	T	4	0		31MA	UT	3	3
21SE	UT	1	1		10AU	T	4	1		31MA	UT	3	3
21SE	UT	1	2		10AU	T	4	0		31MA	UT	3	2
21SE	UT	1	3		10AU	T	4	0		31MA	UT	3	3
21SE	UT	1	4		10AU	T	4	2		31MA	UT	3	3
21SE	UT	1	2		10AU	T	4	0		31MA	UT	3	3
21SE	UT	1	0		10AU	T	4	0		31MA	UT	3	3
21SE	UT	1	4		17AU	A	1	0		31MA	UT	3	2
21SE	UT	1	2		17AU	A	2	2		31MA	UT	3	3
21SE	UT	1	1		17AU	B	1	0		31MA	UT	3	3
21SE	UT	1	3		17AU	B	1	0		31MA	UT	4	2
21SE	UT	2	1		17AU	B	1	0		31MA	UT	4	0
21SE	UT	2	0		17AU	B	1	0		31MA	UT	4	2
21SE	UT	2	0		17AU	B	1	0		31MA	UT	4	2
21SE	UT	2	2		17AU	B	1	0		31MA	UT	4	0
21SE	UT	2	0		17AU	B	1	0		31MA	UT	4	0
21SE	UT	2	1		17AU	B	1	0		31MA	UT	4	3
21SE	UT	2	2		17AU	B	1	0		31MA	UT	4	3
21SE	UT	2	2		17AU	B	2	0		31MA	UT	4	0
21SE	UT	2	2		17AU	B	2	0		31MA	UT	4	0
21SE	UT	2	1		17AU	B	2	1		31MA	C	1	0
21SE	UT	3	1		17AU	B	2	0		31MA	C	1	0
21SE	UT	3	6		17AU	B	2	1		31MA	C	1	0
21SE	UT	3	5		17AU	B	2	0		31MA	C	1	0
21SE	UT	3	2		17AU	B	2	0		31MA	C	1	0
21SE	UT	3	2		17AU	B	2	0		31MA	C	1	0
21SE	UT	3	0		17AU	B	2	2		31MA	C	1	0
21SE	UT	3	1		17AU	B	3	0		31MA	C	1	0
21SE	UT	3	1		17AU	B	3	0		31MA	C	1	0
21SE	UT	3	2		17AU	B	3	0		31MA	C	1	0
21SE	UT	3	1		17AU	B	3	0		31MA	C	2	0
21SE	UT	4	1		17AU	B	3	0		31MA	C	2	1
21SE	UT	4	1		17AU	B	3	0		31MA	C	2	1
21SE	UT	4	1		17AU	B	3	1		31MA	C	2	0
21SE	UT	4	1		17AU	B	3	0		31MA	C	2	0
21SE	UT	4	1		17AU	B	3	0		31MA	C	2	0
21SE	UT	4	1		17AU	B	4	0		31MA	C	2	0
21SE	UT	4	0		17AU	B	4	0		31MA	C	2	0
21SE	UT	4	0		17AU	B	4	0		31MA	C	2	0
21SE	UT	4	0		17AU	B	4	0		31MA	C	2	0
21SE	UT	4	0		17AU	B	4	0		31MA	C	3	1
21SE	C	1	1		17AU	B	4	0		31MA	C	3	0
21SE	C	1	0		17AU	B	4	0		31MA	C	3	0
21SE	C	1	0		17AU	B	4	0		31MA	C	3	1
21SE	C	1	0		17AU	UT	1	1		31MA	C	3	0
21SE	C	1	0		17AU	UT	1	0		31MA	C	3	0
21SE	C	1	0		17AU	UT	1	0		31MA	C	3	0
21SE	C	1	0		17AU	UT	1	3		31MA	C	3	0
21SE	C	1	0		17AU	UT	1	1		31MA	C	3	0
21SE	C	1	0		17AU	UT	2	3		31MA	C	3	0
21SE	C	1	0		17AU	UT	2	1		31MA	C	4	0
21SE	C	2	1		17AU	UT	2	3		31MA	C	4	0
21SE	C	2	1		17AU	UT	2	1		31MA	C	4	0
21SE	C	2	0		17AU	UT	2	1		31MA	C	4	0
21SE	C	2	0		17AU	UT	2	0		31MA	C	4	0
21SE	C	2	0		17AU	UT	2	1		31MA	C	4	0
21SE	C	2	2		17AU	UT	2	1		31MA	C	4	0
21SE	C	2	0		17AU	UT	2	0		31MA	C	4	0
21SE	C	2	0		17AU	C	1	0		31MA	C	4	0
21SE	C	2	1		17AU	C	1	0		31MA	C	4	0
21SE	C	2	0		17AU	C	1	0		31MA	T	1	1
21SE	C	3	1		17AU	C	1	0		31MA	T	1	1
21SE	C	3	0		17AU	C	1	0		31MA	T	1	0
21SE	C	3	0		17AU	C	1	0		31MA	T	1	2
21SE	C	3	0		17AU	C	1	0		31MA	T	1	3
21SE	C	3	0		17AU	C	1	1		31MA	T	1	1
21SE	C	3	0		17AU	C	1	0		31MA	T	1	1
21SE	C	3	0		17AU	C	2	1		31MA	T	1	1
21SE	C	3	0		17AU	C	2	2		31MA	T	1	1
21SE	C	3	0		17AU	C	2	3		31MA	T	1	1
21SE	C	3	0		17AU	C	2	1		31MA	T	2	1
21SE	C	4	1		17AU	C	2	0		31MA	T	2	0
21SE	C	4	1		17AU	C	2	1		31MA	T	2	1
21SE	C	4	0		17AU	C	2	0		31MA	T	2	1
21SE	C	4	0		17AU	C	2	0		31MA	T	2	1
21SE	C	4	1		17AU	C	2	0		31MA	T	2	0
21SE	C	4	1		17AU	C	2	0		31MA	T	2	0
21SE	C	4	1		17AU	C	3	0		31MA	T	2	0
21SE	C	4	0		17AU	C	3	0		31MA	T	2	0
21SE	C	4	0		17AU	C	3	0		31MA	T	2	0
21SE	C	4	0		17AU	C	3	0		31MA	T	3	3
21SE	T	1	1		17AU	C	3	0		31MA	T	3	3
21SE	T	1	1		17AU	C	3	0		31MA	T	3	3
21SE	T	1	2		17AU	C	4	0		31MA	T	3	3
21SE	T	1	0		17AU	C	4	0		31MA	T	3	2
21SE	T	1	0		17AU	C	4	0		31MA	T	3	3
21SE	T	1	0		17AU	C	4	0		31MA	T	3	3
21SE	T	1	0		17AU	C	4	0		31MA	T	3	3
21SE	T	1	0		17AU	C	4	0		31MA	T	3	3
21SE	T	1	0		17AU	C	4	0		31MA	T	3	3
21SE	T	1	0		17AU	C	4	0		31MA	T	4	0
21SE	T	2	1		17AU	T	1	0		31MA	T	4	0
21SE	T	2	1		17AU	T	1	0		31MA	T	4	0
21SE	T	2	1		17AU	T	1	1		31MA	T	4	1
21SE	T	2	0		17AU	T	2	1		31MA	T	4	0
21SE	T	2	0		17AU	T	2	0		31MA	T	4	0
21SE	T	2	0		17AU	T	2	1		31MA	T	4	1
21SE	T	2	0		17AU	T	2	1		31MA	T	4	1
21SE	T	2	0		17AU	T	2	1		31MA	T	4	1
21SE	T	2	0		17AU	T	2	0		31MA	T	4	0
21SE	T	2	0		17AU	T	2	0		29JU	A	1	0
21SE	T	3	1		17AU	T	2	1		29JU	A	1	0
21SE	T	3	0		17AU	T	2	0		29JU	A	1	0
21SE	T	3	0		17AU	T	3	0		29JU	A	1	0
21SE	T	3	0		17AU	T	3	0		29JU	A	1	0
21SE	T	3	0		17AU	T	3	0		29JU	A	1	0
21SE	T	3	0		14SE	A	1	0		29JU	A	1	0
21SE	T	3	0		14SE	A	1	0		29JU	A	1	0
21SE	T	3	0		14SE	A	1	0		29JU	A	1	0
21SE	T	3	0		14SE	A	1	0		29JU	A	1	0
21SE	T	3	0		14SE	A	1	0		29JU	A	2	0
21SE	T	4	1		14SE	A	1	0		29JU	A	2	0
21SE	T	4	3		14SE	A	1	0		29JU	A	2	0
21SE	T	4	2		14SE	A	1	0		29JU	A	2	0
21SE	T	4	1		14SE	A	1	0		29JU	A	2	0
21SE	T	4	1		14SE	A	1	0		29JU	A	2	0
21SE	T	4	1		14SE	A	2	1		29JU	A	2	0
21SE	T	4	3		14SE	A	2	1		29JU	A	2	0
21SE	T	4	0		14SE	A	2	3		29JU	A	2	0
21SE	T	4	0		14SE	A	2	1		29JU	A	2	0
21SE	T	4	0		14SE	A	2	0		29JU	A	3	0
21A	A	1	1		14SE	A	2	0		29JU	A	3	0
21A	A	1	0		14SE	A	2	3		29JU	A	3	0
21A	A	1	0		14SE	A	2	2		29JU	A	3	0
21A	A	1	0		14SE	A	2	1		29JU	A	3	0
21A	A	1	0		14SE	A	3	0		29JU	A	3	0
21A	A	1	0		14SE	A	3	3		29JU	A	3	0
21A	A	1	0		14SE	A	3	2		29JU	A	3	0
21A	A	1	0		14SE	A	3	1		29JU	A	3	0
21A	A	1	0		14SE	A	4	1		29JU	A	3	0
21A	A	1	0		14SE	A	4	0		29JU	A	4	0
21A	A	2	0		14SE	A	4	0		29JU	A	4	0
21A	A	2	0		14SE	A	4	0		29JU	A	4	0
21A	A	2	1		14SE	A	4	1		29JU	A	4	0
21A	A	2	0		14SE	A	4	0		29JU	A	4	0
21A	A	2	0		14SE	A	4	0		29JU	A	4	0
21A	A	2	0		14SE	A	4	1		29JU	A	4	0
21A	A	2	0		14SE	A	4	0		29JU	A	4	0
21A	A	2	0		14SE	A	4	0		29JU	A	4	0
21A	A	2	0		14SE	B	1	0		29JU	A	4	0
21A	A	2	0		14SE	B	1	0		29JU	B	1	0
21A	A	3	0		14SE	B	1	0		29JU	B	1	0
21A	A	3	0		14SE	B	1	1		29JU	B	1	1
21A	A	3	0		14SE	B	1	0		29JU	B	1	0
21A	A	3	0		14SE	B	1	3		29JU	B	1	0
21A	A	3	0		14SE	B	1	0		29JU	B	1	0
21A	A	3	0		14SE	B	1	0		29JU	B	1	0
21A	A	3	0		14SE	B	1	1		29JU	B	1	0
21A	A	3	0		14SE	B	1	0		29JU	B	1	0
21A	A	3	0		14SE	B	2	0		29JU	B	1	0
21A	A	3	0		14SE	B	2	0		29JU	B	2	1
21A	A	4	0		14SE	B	2	0		29JU	B	2	0
21A	A	4	1		14SE	B	2	0		29JU	B	2	0
21A	A	4	1		14SE	B	2	0		29JU	B	2	0
21A	A	4	1		14SE	B	2	0		29JU	B	2	0
21A	A	4	0		14SE	B	2	0		29JU	B	2	0
21A	A	4	0		14SE	B	2	0		29JU	B	2	0
21A	A	4	0		14SE	B	3	2		29JU	B	2	0
21A	A	4	0		14SE	B	3	1		29JU	B	2	0
21A	A	4	0		14SE	B	3	2		29JU	B	2	0
21A	A	4	0		14SE	B	3	0		29JU	B	3	0
21A	T	1	1		14SE	B	3	1		29JU	B	3	1
21A	T	1	0		14SE	B	3	0		29JU	B	3	0
21A	T	1	0		14SE	B	3	1		29JU	B	3	0
21A	T	1	0		14SE	B	4	1		29JU	B	3	0
21A	T	1	0		14SE	B	4	0		29JU	B	3	0
21A	T	1	0		14SE	B	4	0		29JU	B	3	0
21A	T	1	0		14SE	UT	1	2		29JU	B	3	0
21A	T	1	0		14SE	UT	1	3		29JU	B	3	0
21A	T	1	0		14SE	UT	1	1		29JU	B	3	0
21A	T	1	0		14SE	UT	1	1		29JU	B	4	1
21A	T	2	0		14SE	UT	1	1		29JU	B	4	0
21A	T	2	0		14SE	UT	1	3		29JU	B	4	0
21A	T	2	0		14SE	UT	1	2		29JU	B	4	0
21A	T	2	0		14SE	UT	1	1		29JU	B	4	0
21A	T	2	0		14SE	UT	1	3		29JU	B	4	1
21A	T	2	0		14SE	UT	1	0		29JU	B	4	1
21A	T	2	0		14SE	UT	2	1		29JU	B	4	1
21A	T	2	0		14SE	UT	2	1		29JU	B	4	0
21A	T	2	0		14SE	UT	2	0		29JU	B	4	2
21A	T	2	0		14SE	UT	2	2		29JU	UT	1	1
21A	T	3	0		14SE	UT	2	1		29JU	UT	1	0
21A	T	3	0		14SE	UT	2	1		29JU	UT	1	1
21A	T	3	0		14SE	UT	2	3		29JU	UT	1	0
21A	T	3	0		14SE	UT	2	2		29JU	UT	1	0
21A	T	3	0		14SE	UT	2	1		29JU	UT	1	1
21A	T	3	0		14SE	UT	2	1		29JU	UT	1	0
21A	T	3	0		14SE	UT	3	3		29JU	UT	1	0
21A	T	3	0		14SE	UT	3	3		29JU	UT	1	2
21A	T	3	0		14SE	UT	3	3		29JU	UT	1	1
21A	T	3	0		14SE	UT	3	2		29JU	UT	2	2
21A	T	4	0		14SE	UT	3	3		29JU	UT	2	1
21A	T	4	0		14SE	UT	3	2		29JU	UT	2	1
21A	T	4	1		14SE	UT	3	3		29JU	UT	2	3
21A	T	4	0		14SE	UT	3	3		29JU	UT	2	1
21A	T	4	0		14SE	UT	3	2		29JU	UT	2	1
21A	T	4	0		14SE	UT	3	3		29JU	UT	2	2
21A	T	4	0		14SE	UT	4	3		29JU	UT	2	1
21A	T	4	0		14SE	UT	4	3		29JU	UT	2	1
21A	T	4	0		14SE	UT	4	1		29JU	UT	2	3
21A	T	4	0		14SE	UT	4	2		29JU	UT	3	3
21A	C	1	0		14SE	UT	4	3		29JU	UT	3	1
21A	C	1	0		14SE	UT	4	1		29JU	UT	3	2
21A	C	1	0		14SE	UT	4	2		29JU	UT	3	1
21A	C	1	0		14SE	UT	4	3		29JU	UT	3	0
21A	C	1	0		14SE	UT	4	0		29JU	UT	3	0
21A	C	1	0		14SE	UT	4	2		29JU	UT	3	1
21A	C	1	0		14SE	C	1	0		29JU	UT	3	1
21A	C	1	0		14SE	C	1	0		29JU	UT	3	3
21A	C	1	0		14SE	C	1	0		29JU	UT	3	1
21A	C	1	2		14SE	C	1	0		29JU	UT	4	2
21A	C	2	0		14SE	C	1	0		29JU	UT	4	2
21A	C	2	0		14SE	C	1	0		29JU	UT	4	0
21A	C	2	1		14SE	C	1	0		29JU	UT	4	1
21A	C	2	1		14SE	C	1	0		29JU	UT	4	3
21A	C	2	1		14SE	C	1	0		29JU	UT	4	1
21A	C	2	1		14SE	C	1	0		29JU	UT	4	0
21A	C	2	1		14SE	C	2	1		29JU	UT	4	0
21A	C	2	0		14SE	C	2	0		29JU	UT	4	0
21A	C	2	0		14SE	C	2	0		29JU	UT	4	0
21A	C	2	0		14SE	C	2	3		29JU	C	1	1
21A	C	3	0		14SE	C	2	3		29JU	C	1	0
21A	C	3	1		14SE	C	2	3		29JU	C	1	0
21A	C	3	0		14SE	C	2	0		29JU	C	1	1
21A	C	3	0		14SE	C	2	0		29JU	C	1	1
21A	C	3	0		14SE	C	2	0		29JU	C	1	0
21A	C	3	0		14SE	C	2	0		29JU	C	1	0
21A	C	3	0		14SE	C	3	0		29JU	C	1	0
21A	C	3	0		14SE	C	3	0		29JU	C	1	0
21A	C	3	0		14SE	C	3	0		29JU	C	1	0
21A	C	3	0		14SE	C	3	1		29JU	C	2	0
21A	C	4	0		14SE	C	3	0		29JU	C	2	0
21A	C	4	0		14SE	C	3	1		29JU	C	2	0
21A	C	4	0		14SE	C	3	0		29JU	C	2	0
21A	C	4	0		14SE	C	3	0		29JU	C	2	0
21A	C	4	0		14SE	C	3	0		29JU	C	2	0
21A	C	4	0		14SE	C	3	0		29JU	C	2	0
21A	C	4	0		14SE	C	4	3		29JU	C	2	0
21A	C	4	0		14SE	C	4	3		29JU	C	2	0
21A	C	4	0		14SE	C	4	1		29JU	C	2	0
21A	C	4	0		14SE	C	4	3		29JU	C	3	0
21A	UT	1	0		14SE	C	4	3		29JU	C	3	0
21A	UT	1	0		14SE	C	4	2		29JU	C	3	0
21A	UT	1	0		14SE	C	4	3		29JU	C	3	0
21A	UT	1	0		14SE	C	4	0		29JU	C	3	0
21A	UT	1	0		14SE	C	4	0		29JU	C	3	0
21A	UT	1	0		14SE	C	4	0		29JU	C	3	0
21A	UT	1	0		14SE	T	1	0		29JU	C	3	0
21A	UT	1	0		14SE	T	1	1		29JU	C	3	0
21A	UT	1	0		14SE	T	1	1		29JU	C	3	0
21A	UT	1	0		14SE	T	1	3		29JU	C	4	0
21A	UT	2	1		14SE	T	1	1		29JU	C	4	1
21A	UT	2	0		14SE	T	1	0		29JU	C	4	0
21A	UT	2	0		14SE	T	1	0		29JU	C	4	0
21A	UT	2	0		14SE	T	1	0		29JU	C	4	0
21A	UT	2	0		14SE	T	1	0		29JU	C	4	0
21A	UT	2	0		14SE	T	1	0		29JU	C	4	0
21A	UT	2	0		14SE	T	2	1		29JU	C	4	0
21A	UT	2	0		14SE	T	2	0		29JU	C	4	0
21A	UT	2	0		14SE	T	2	1		29JU	C	4	0
21A	UT	2	0		14SE	T	2	1		29JU	T	1	0
21A	UT	3	0		14SE	T	2	0		29JU	T	1	0
21A	UT	3	0		14SE	T	2	0		29JU	T	1	0
21A	UT	3	0		14SE	T	2	0		29JU	T	1	0
21A	UT	3	0		14SE	T	2	3		29JU	T	1	0
21A	UT	3	0		14SE	T	2	1		29JU	T	1	0
21A	UT	3	0		14SE	T	2	0		29JU	T	1	0
21A	UT	3	0		14SE	T	3	0		29JU	T	1	0
21A	UT	3	0		14SE	T	3	0		29JU	T	1	0
21A	UT	3	1		14SE	T	3	0		29JU	T	1	1
21A	UT	3	1		14SE	T	3	1		29JU	T	2	1
21A	UT	4	0		14SE	T	3	0		29JU	T	2	0
21A	UT	4	1		14SE	T	3	0		29JU	T	2	0
21A	UT	4	0		14SE	T	3	0		29JU	T	2	0
21A	UT	4	0		14SE	T	3	0		29JU	T	2	1
21A	UT	4	0		14SE	T	3	0		29JU	T	2	0
21A	UT	4	0		14SE	T	3	0		29JU	T	2	0
21A	UT	4	0		14SE	T	4	0		29JU	T	2	0
21A	UT	4	0		14SE	T	4	0		29JU	T	2	0
21A	UT	4	0		14SE	T	4	1		29JU	T	2	0
21A	UT	4	0		14SE	T	4	0		29JU	T	3	0
21A	B	1	0		14SE	T	4	0		29JU	T	3	0
21A	B	1	0		14SE	T	4	1		29JU	T	3	3
21A	B	1	0		14SE	T	4	0		29JU	T	3	0
21A	B	1	0		14SE	T	4	0		29JU	T	3	0
21A	B	1	0		14SE	T	4	0		29JU	T	3	1
21A	B	1	0		14SE	T	4	0		29JU	T	3	1
21A	B	1	0		22SE	A	1	3		29JU	T	3	0
21A	B	1	0		22SE	A	1	0		29JU	T	3	0
21A	B	1	0		22SE	A	1	0		29JU	T	3	0
21A	B	1	1		22SE	A	1	0		29JU	T	4	1
21A	B	2	0		22SE	A	1	0		29JU	T	4	1
21A	B	2	0		22SE	A	1	1		29JU	T	4	1
21A	B	2	0		22SE	A	2	2		29JU	T	4	0
21A	B	2	0		22SE	A	2	1		29JU	T	4	0
21A	B	2	0		22SE	A	2	1		29JU	T	4	0
21A	B	2	0		22SE	A	2	1		29JU	T	4	0
21A	B	2	0		22SE	A	2	1		29JU	T	4	0
21A	B	2	0		22SE	A	2	1		29JU	T	4	0
21A	B	2	0		22SE	A	2	1		29JU	T	4	0
21A	B	2	0		22SE	A	2	3		13JU	A	1	0
21A	B	3	0		22SE	A	2	0		13JU	A	1	2
21A	B	3	0		22SE	A	2	1		13JU	A	1	3
21A	B	3	0		22SE	A	4	1		13JU	A	1	3
21A	B	3	0		22SE	A	4	1		13JU	A	1	1
21A	B	3	0		22SE	A	4	0		13JU	A	1	2
21A	B	3	0		22SE	A	4	1		13JU	A	1	0
21A	B	3	0		22SE	A	4	1		13JU	A	1	0
21A	B	3	0		22SE	A	4	1		13JU	A	1	0
21A	B	3	0		22SE	A	4	0		13JU	A	1	1
21A	B	3	0		22SE	A	4	0		13JU	A	2	3
21A	B	4	4		22SE	A	4	3		13JU	A	2	1
21A	B	4	0		22SE	A	4	1		13JU	A	2	1
21A	B	4	1		22SE	B	1	1		13JU	A	2	0
21A	B	4	1		22SE	B	1	1		13JU	A	2	0
21A	B	4	1		22SE	B	1	1		13JU	A	2	2
21A	B	4	0		22SE	B	1	1		13JU	A	2	1
21A	B	4	0		22SE	B	1	0		13JU	A	2	1
21A	B	4	0		22SE	B	1	0		13JU	A	2	1
21A	B	4	0		22SE	B	1	0		13JU	A	2	0
21A	B	4	0		22SE	B	1	1		13JU	A	3	3
29JU	A	1	0		22SE	B	1	0		13JU	A	3	1
29JU	A	1	0		22SE	B	1	0		13JU	A	3	2
29JU	A	1	0		22SE	B	2	2		13JU	A	3	0
29JU	A	1	0		22SE	B	2	1		13JU	A	3	1
29JU	A	1	0		22SE	B	2	0		13JU	A	3	1
29JU	A	1	0		22SE	B	2	1		13JU	A	3	0
29JU	A	1	0		22SE	B	2	3		13JU	A	3	2
29JU	A	1	0		22SE	B	2	1		13JU	A	3	2
29JU	A	1	0		22SE	B	2	0		13JU	A	3	0
29JU	A	1	0		22SE	B	2	2		13JU	A	4	0
29JU	A	2	0		22SE	B	2	0		13JU	A	4	0
29JU	A	2	0		22SE	B	2	3		13JU	A	4	0
29JU	A	2	0		22SE	B	3	1		13JU	A	4	0
29JU	A	2	0		22SE	B	3	0		13JU	A	4	0
29JU	A	2	0		22SE	B	3	0		13JU	A	4	1
29JU	A	2	0		22SE	B	3	0		13JU	A	4	0
29JU	A	2	0		22SE	B	3	0		13JU	A	4	2
29JU	A	2	0		22SE	B	3	0		13JU	A	4	0
29JU	A	2	0		22SE	B	3	0		13JU	A	4	2
29JU	A	2	0		22SE	B	3	0		13JU	B	1	0
29JU	A	3	0		22SE	B	3	0		13JU	B	1	1
29JU	A	3	0		22SE	B	3	0		13JU	B	1	0
29JU	A	3	0		22SE	B	4	0		13JU	B	1	0
29JU	A	3	0		22SE	B	4	1		13JU	B	1	1
29JU	A	3	0		22SE	B	4	1		13JU	B	1	0
29JU	A	3	0		22SE	B	4	1		13JU	B	1	0
29JU	A	3	0		22SE	B	4	1		13JU	B	1	2
29JU	A	3	0		22SE	B	4	1		13JU	B	1	0
29JU	A	3	0		22SE	UT	1	1		13JU	B	1	3
29JU	A	3	0		22SE	UT	1	0		13JU	B	2	3
29JU	A	4	0		22SE	UT	1	0		13JU	B	2	1
29JU	A	4	0		22SE	UT	1	0		13JU	B	2	3
29JU	A	4	0		22SE	UT	1	0		13JU	B	2	2
29JU	A	4	0		22SE	UT	1	1		13JU	B	2	3
29JU	A	4	0		22SE	UT	1	1		13JU	B	2	3
29JU	A	4	0		22SE	UT	1	1		13JU	B	2	3
29JU	A	4	0		22SE	UT	1	1		13JU	B	2	3
29JU	A	4	0		22SE	UT	2	3		13JU	B	2	3
29JU	A	4	0		22SE	UT	2	1		13JU	B	2	3
29JU	A	4	0		22SE	UT	2	3		13JU	B	3	1
29JU	B	1	0		22SE	UT	2	3		13JU	B	3	3
29JU	B	1	0		22SE	UT	2	1		13JU	B	3	2
29JU	B	1	0		22SE	UT	2	0		13JU	B	3	0
29JU	B	1	0		22SE	UT	2	1		13JU	B	3	1
29JU	B	1	0		22SE	UT	2	2		13JU	B	3	0
29JU	B	1	0		22SE	UT	2	1		13JU	B	3	0
29JU	B	1	0		22SE	UT	2	1		13JU	B	3	0
29JU	B	1	0		22SE	UT	3	1		13JU	B	3	0
29JU	B	1	0		22SE	UT	3	0		13JU	B	3	1
29JU	B	1	0		22SE	UT	3	0		13JU	B	4	0
29JU	B	2	0		22SE	UT	3	0		13JU	B	4	0
29JU	B	2	1		22SE	UT	4	0		13JU	B	4	0
29JU	B	2	0		22SE	UT	4	1		13JU	B	4	3
29JU	B	2	0		22SE	UT	4	2		13JU	B	4	2
29JU	B	2	0		22SE	UT	4	1		13JU	B	4	2
29JU	B	2	0		22SE	UT	4	3		13JU	B	4	1
29JU	B	2	0		22SE	UT	4	1		13JU	B	4	1
29JU	B	2	0		22SE	UT	4	1		13JU	B	4	3
29JU	B	2	0		22SE	UT	4	1		13JU	B	4	0
29JU	B	2	0		22SE	UT	4	1		13JU	UT	1	2
29JU	B	3	0		22SE	C	1	1		13JU	UT	1	3
29JU	B	3	0		22SE	C	1	1		13JU	UT	1	3
29JU	B	3	0		22SE	C	1	0		13JU	UT	1	3
29JU	B	3	0		22SE	C	1	1		13JU	UT	1	2
29JU	B	3	0		22SE	C	1	3		13JU	UT	1	1
29JU	B	3	0		22SE	C	1	3		13JU	UT	1	2
29JU	B	3	0		22SE	C	1	1		13JU	UT	1	3
29JU	B	3	0		22SE	C	1	1		13JU	UT	1	2
29JU	B	3	0		22SE	C	1	0		13JU	UT	1	2
29JU	B	3	0		22SE	C	2	0		13JU	UT	2	1
29JU	B	4	1		22SE	C	2	1		13JU	UT	2	1
29JU	B	4	0		22SE	C	2	1		13JU	UT	2	0
29JU	B	4	0		22SE	C	2	2		13JU	UT	2	1
29JU	B	4	0		22SE	C	2	1		13JU	UT	2	2
29JU	B	4	0		22SE	C	2	3		13JU	UT	2	1
29JU	B	4	0		22SE	C	2	1		13JU	UT	2	1
29JU	B	4	0		22SE	C	2	3		13JU	UT	2	1
29JU	B	4	0		22SE	C	2	1		13JU	UT	2	3
29JU	B	4	0		22SE	C	2	1		13JU	UT	2	2
29JU	B	4	0		22SE	C	3	3		13JU	UT	3	3
29JU	UT	1	1		22SE	C	3	1		13JU	UT	3	3
29JU	UT	1	1		22SE	C	3	1		13JU	UT	3	3
29JU	UT	1	1		22SE	C	3	1		13JU	UT	3	3
29JU	UT	1	0		22SE	C	3	2		13JU	UT	3	1
29JU	UT	1	0		22SE	C	3	1		13JU	UT	3	2
29JU	UT	1	0		22SE	C	3	1		13JU	UT	3	3
29JU	UT	1	0		22SE	C	3	2		13JU	UT	3	3
29JU	UT	1	0		22SE	C	3	1		13JU	UT	3	3
29JU	UT	1	0		22SE	C	3	1		13JU	UT	3	3
29JU	UT	1	0		22SE	C	4	1		13JU	UT	4	2
29JU	UT	2	1		22SE	C	4	3		13JU	UT	4	1
29JU	UT	2	2		22SE	C	4	1		13JU	UT	4	1
29JU	UT	2	2		22SE	C	4	1		13JU	UT	4	3
29JU	UT	2	1		22SE	C	4	2		13JU	UT	4	1
29JU	UT	2	0		22SE	C	4	3		13JU	UT	4	3
29JU	UT	2	0		22SE	C	4	1		13JU	UT	4	1
29JU	UT	2	0		22SE	C	4	3		13JU	UT	4	1
29JU	UT	2	0		22SE	C	4	1		13JU	C	1	0
29JU	UT	2	0		22SE	C	4	0		13JU	C	1	0
29JU	UT	2	0		22SE	T	1	2		13JU	C	1	0
29JU	UT	3	1		22SE	T	1	1		13JU	C	1	0
29JU	UT	3	5		22SE	T	1	1		13JU	C	1	0
29JU	UT	3	0		22SE	T	1	1		13JU	C	1	0
29JU	UT	3	0		22SE	T	1	0		13JU	C	1	0
29JU	UT	3	0		22SE	T	1	1		13JU	C	1	0
29JU	UT	3	0		22SE	T	1			13JU	C	1	0
29JU	UT	3	0		22SE	T	1	1		13JU	C	1	1
29JU	UT	3	0		22SE	T	1	1		13JU	C	2	1
29JU	UT	3	0		22SE	T	1	1		13JU	C	2	1
29JU	UT	3	0		22SE	T	2	1		13JU	C	2	0
29JU	UT	4	1		22SE	T	2	0		13JU	C	2	0
29JU	UT	4	1		22SE	T	2	1		13JU	C	2	0
29JU	UT	4	1		22SE	T	2	1		13JU	C	2	1
29JU	UT	4	1		22SE	T	2	1		13JU	C	2	0
29JU	UT	4	0		22SE	T	2	0		13JU	C	2	1
29JU	UT	4	0		22SE	T	2	1		13JU	C	2	0
[truncated: 1,871 more rows]

## Sheet: Table 5
Probit regression for Diaphorina citri adults exposed to fenpropathrin from field plots under different insecticide treatment rotations
Before application laboratory population														After application field population
																							A
Dose mortality data of Asian citrus psyllid for Danitol 2.4EC (ng/μl) (48hour)														Dose mortality data of Asian citrus psyllid for Danitiol 2.4EC (ng/μl) (48hour)																					UT
Insecticide	Concentration	Replication 1		Replication 2		Replication 3		Replication 4		Replication 5				Insecticide	Concentration	Replication 1		Replication 2		Replication 3		Replication 4				Inseticide	Concentration	Replication 1		Replication 2		Replication 3		Replication 4
		Total Number	Dead ACP	Total Number	Dead ACP	Total Number	Dead ACP	Total Number	Dead ACP	Total Number	Dead ACP					Total Number	Dead ACP	Total Number	Dead ACP	Total Number	Dead ACP	Total Number	Dead ACP					Total Number	Dead ACP	Total Number	Dead ACP	Total Number	Dead ACP	Total Number	Dead ACP
Water	0	10	0	10	0	10	0	10	0	10	0			Water	0	10	0	11	0	12	0	11	0			Water	0	10	0	11	0	10	0	10	0
Danitol 2.4EC	0.01	10	2	10	0	10	2	10	0	10	2			Dantiol	0.001	10	0	11	0	10	0	10	0			Dantiol	0.001	10	0	11	0	10	0	10	0
Danitol 2.4EC	0.1	10	3	10	3	10	3	10	4	10	3			Dantiol	0.01	10	0	10	1	10	2	10	2			Dantiol	0.01	10	1	11	1	10	1	10	1
Danitol 2.4EC	1	10	9	10	9	10	9	10	9	10	9			Dantiol	0.1	10	2	11	4	10	3	11	4			Dantiol	0.1	10	3	10	2	10	6	10	5
Danitol 2.4EC	10	10	10	10	10	10	10	10	10	10	9			Dantiol	1	10	5	10	6	10	6	10	5			Dantiol	1	10	7	10	5	10	6	10	7
Danitol 2.4EC	100	10	10	10	10	10	10	10	10	10	10			Dantiol	10	10	10	10	10	10	10	10	10			Dantiol	10	10	10	11	11	11	11	12	12
Danitol 2.4EC	1000	10	10	10	10	10	10	10	10	10	10			Dantiol	100	10	10	10	10	10	10	11	11			Dantiol	100	11	11	11	11	12	12	12	12
																							B												T
Before application field population														Insecticide	Concentration	Replication 1		Replication 2		Replication 3		Replication 4				Inseticide	Concentration	Replication 1		Replication 2		Replication 3		Replication 4
Dose mortality data of Asian citrus psyllid for Danitol 2.4EC (ng/μl) (48hour)																Total Number	Dead ACP	Total Number	Dead ACP	Total Number	Dead ACP	Total Number	Dead ACP					Total Number	Dead ACP	Total Number	Dead ACP	Total Number	Dead ACP	Total Number	Dead ACP
Insecticide	Concentration	Replication 1		Replication 2		Replication 3		Replication 4		Replication 5				Water	0	10	0	11	0	11	1	10	0			Water	0	10	0	12	0	10	0	10	0
		Total Number	Dead ACP	Total Number	Dead ACP	Total Number	Dead ACP	Total Number	Dead ACP	Total Number	Dead ACP			Dantiol	0.001	10	0	10	0	11	1	11	0			Dantiol	0.001	10	0	10	0	10	0	10	1
Water	0	10	0	10	0	10	0	10	0	10	0			Dantiol	0.01	10	0	11	1	10	2	12	2			Dantiol	0.01	10	1	11	1	10	1	10	2
Danitol 2.4EC	0.01	10	1	10	1	10	2	10	2	10	2			Dantiol	0.1	10	3	10	4	10	4	10	5			Dantiol	0.1	10	3	11	3	10	5	10	4
Danitol 2.4EC	0.1	10	5	10	5	10	5	10	5	10	4			Dantiol	1	10	5	10	5	10	6	10	7			Dantiol	1	10	6	10	5	10	6	10	6
Danitol 2.4EC	1	10	6	10	6	10	9	10	8	10	6			Dantiol	10	10	10	10	10	10	10	10	10			Dantiol	10	10	10	11	11	11	11	10	10
Danitol 2.4EC	10	10	10	10	10	10	10	10	10	10	9			Dantiol	100	11	11	12	12	10	10	12	12			Dantiol	100	11	11	12	12	11	11	12	12
Danitol 2.4EC	100	10	10	10	10	10	10	10	10	10	10
																							C
														Insecticide	Concentration	Replication 1		Replication 2		Replication 3		Replication 4
																Total Number	Dead ACP	Total Number	Dead ACP	Total Number	Dead ACP	Total Number	Dead ACP
														Water	0	10	0	11	0	10	0	10	0
														Dantiol	0.001	10	0	11	0	10	0	10	0
														Dantiol	0.01	10	0	10	1	10	1	10	1
														Dantiol	0.1	10	5	11	3	10	4	10	4
														Dantiol	1	10	7	11	7	10	7	10	7
														Dantiol	10	10	10	10	10	11	11	12	12
														Dantiol	100	11	11	10	10	10	10	11	11

## Sheet: Table 6 
Probit regression for Diaphorina citri adults exposed to abamectin 3% + thiamethoxam 13.9% from field plots under different insecticide treatment rotations
Before application laboratory population														After application field population									A
Dose mortality data of Asian citrus psyllid for Agri Flex (ng/μl) (48hour)														Dose mortality data of Asian citrus psyllid for Agri Fkex (ng/μl) (48hour)																					UT
Insecticide	Concentration	Replication 1		Replication 2		Replication 3		Replication 4		Replication 5				Insecticide	Concentration	Replication 1		Replication 2		Replication 3		Replication 4				Inseticide	Concentration	Replication 1		Replication 2		Replication 3		Replication 4
		Total Number	Dead ACP	Total Number	Dead ACP	Total Number	Dead ACP	Total Number	Dead ACP	Total Number	Dead ACP					Total Number	Dead ACP	Total Number	Dead ACP	Total Number	Dead ACP	Total Number	Dead ACP					Total Number	Dead ACP	Total Number	Dead ACP	Total Number	Dead ACP	Total Number	Dead ACP
Water	0	5	0	5	0	5	0	5	0	5	0			Water	0	10	0	10	0	10	0	10	0			Water	0	10	0	10	0	10	0	10	0
Agri Flex	0.01	5	2	5	2	5	2	5	0	5	1			Agri Flex	0.001	10	1	10	1	10	1	10	1			Agri Flex	0.001	10	1	10	1	10	1	10	1
Agri Flex	0.1	5	3	5	3	5	2	5	2	5	2			Agri Flex	0.01	10	3	11	3	10	3	10	4			Agri Flex	0.01	10	2	10	2	10	1	10	1
Agri Flex	1	5	3	5	4	5	3	5	4	5	5			Agri Flex	0.1	10	5	11	5	10	5	10	5			Agri Flex	0.1	10	4	11	5	10	4	10	5
Agri Flex	10	5	4	5	5	5	5	5	5	5	5			Agri Flex	1	10	10	11	10	11	10	11	10			Agri Flex	1	10	9	12	11	10	9	10	9
Agri Flex	100	5	5	5	5	5	5	5	5	5	5			Agri Flex	10	10	10	10	10	10	10	10	10			Agri Flex	10	10	10	10	10	10	10	10	10
														Agri Flex	100	10	10	10	10	10	10	10	10			Agri Flex	100	10	10	10	10	10	10	10	10
Dose mortality data of Asian citrus psyllid for Agri Flex (ng/μl) (48hour)																							B												T
Insecticide	Concentration	Replication 1		Replication 2		Replication 3		Replication 4		Replication 5				Insecticide	Concentration	Replication 1		Replication 2		Replication 3		Replication 4				Inseticide	Concentration	Replication 1		Replication 2		Replication 3		Replication 4
		Total Number	Dead ACP	Total Number	Dead ACP	Total Number	Dead ACP	Total Number	Dead ACP	Total Number	Dead ACP					Total Number	Dead ACP	Total Number	Dead ACP	Total Number	Dead ACP	Total Number	Dead ACP					Total Number	Dead ACP	Total Number	Dead ACP	Total Number	Dead ACP	Total Number	Dead ACP
Water	0	5	0	5	0	5	0	5	0	5	0			Water	0	10	0	10	0	10	0	10	0			Water	0	10	0	10	0	10	0	10	0
Agri Flex	0.01	5	1	5	2	5	1	5	1	5	1			Agri Flex	0.001	10	2	10	1	10	1	10	2			Agri flex	0.001	10	1	10	1	10	1	10	1
Agri Flex	0.1	5	2	5	3	5	2	5	2	5	3			Agri Flex	0.01	10	3	10	4	10	4	10	3			Agri flex	0.01	10	2	10	2	10	2	10	2
Agri Flex	1	5	3	5	4	5	3	5	4	5	5			Agri Flex	0.1	10	4	11	6	10	4	10	5			Agri flex	0.1	10	10	11	5	10	5	10	5
Agri Flex	10	5	4	5	5	5	4	5	5	5	5			Agri Flex	1	10	9	10	9	10	9	10	9			Agri flex	1	10	10	12	11	10	8	10	9
Agri Flex	100	5	5	5	5	5	5	5	5	5	5			Agri Flex	10	10	10	10	10	10	10	10	10			Agri flex	10	10	10	10	10	10	10	10	10
														Agri Flex	100	10	10	10	10	10	10	10	10			Agri flex	100	10	10	10	10	10	10	10	10
																							C
Before application field population														Insecticide	Concentration	Replication 1		Replication 2		Replication 3		Replication 4
Dose mortality data of Asian citrus psyllid for Agri Flex (ng/μl) (48hour)																Total Number	Dead ACP	Total Number	Dead ACP	Total Number	Dead ACP	Total Number	Dead ACP
Insecticide	Concentration	Replication 1		Replication 2		Replication 3		Replication 4		Replication 5				Water	0	10	0	10	0	10	0	11	0
		Total Number	Dead ACP	Total Number	Dead ACP	Total Number	Dead ACP	Total Number	Dead ACP	Total Number	Dead ACP			Agri Flex	0.001	10	1	11	1	10	1	10	1
Water	0	10	0	10	0	10	0	10	0	10	0			Agri Flex	0.01	10	2	10	4	10	4	10	4
Agri Flex	0.01	10	2	10	2	10	4	10	2	10	2			Agri Flex	0.1	10	5	11	6	10	6	10	6
Agri Flex	0.1	10	5	10	4	10	5	10	5	10	3			Agri Flex	1	10	9	11	10	10	9	10	9
Agri Flex	1	10	8	10	8	10	8	10	8	10	6			Agri Flex	10	10	10	10	10	10	10	10	10
Agri Flex	10	10	9	10	9	10	9	10	8	10	10			Agri Flex	100	10	10	10	10	10	10	10	10
Agri Flex	100	10	10	10	10	10	10	10	10	10	10
Agri Flex	1000	10	10	10	10	10	10	10	10	10	10

## Sheet: Table 7
Probit regression for Diaphorina citri adults exposed to dimethoate from field plots under different insecticide treatment rotations
Before application laboratory population															After application field population
																								A
Dose mortality data of Asian citrus psyllid for Dimethoate 4E (ng/μl) (48hour)															Dose mortality data of Asian citrus psyllid for Dimethoate 4E (ng/μl) (48hour)																					UT
Insecticide	Concentration	Replication 1		Replication 2		Replication 3		Replication 4		Replication 5					Insecticide	Concentration	Replication 1		Replication 2		Replication 3		Replication 4				Inseticide	Concentration	Replication 1		Replication 2		Replication 3		Replication 4
		Total	Dead ACP	Total	Dead ACP	Total	Dead ACP	Total	Dead ACP	Total	Dead ACP						Total	Dead ACP	Total	Dead ACP	Total	Dead ACP	Total	Dead ACP					Total	Dead ACP	Total	Dead ACP	Total	Dead ACP	Total	Dead ACP
Water	0	10	0	10	0	10	0	10	0	10	0				Water	0	10	0	10	0	10	0	10	0			Water	0	10	0	10	0	10	0	10	0
Dimethoate	0.01	10	0	10	1	10	0	10	1	10	1				Dimethoate	0.001	12	0	8	1	12	0	10	0			Dimethoate	0.001	10	0	10	1	10	0	10	0
Dimethoate	0.1	10	4	10	5	10	3	10	3	10	3				Dimethoate	0.01	8	0	9	1	10	0	10	1			Dimethoate	0.01	8	1	10	2	10	1	10	2
Dimethoate	1	10	7	10	6	10	6	10	3	10	7				Dimethoate	0.1	10	1	10	2	10	1	10	1			Dimethoate	0.1	10	2	10	3	10	3	10	3
Dimethoate	10	10	10	10	10	10	10	10	10	10	9				Dimethoate	1	9	2	10	7	10	2	10	2			Dimethoate	1	8	6	20	6	10	7	10	6
Dimethoate	100	10	10	10	10	10	10	10	10	10	10				Dimethoate	10	8	2	10	9	10	9	10	8			Dimethoate	10	12	9	10	10	10	8	10	8
Dimethoate	1000	10	10	10	10	10	10	10	10	10	10				Dimethoate	100	10	10	10	10	11	10	10	10			Dimethoate	100	10	10	10	10	12	12	10	10
																								B												T
															Insecticide	Concentration	Replication 1		Replication 2		Replication 3		Replication 4				Inseticide	Concentration	Replication 1		Replication 2		Replication 3		Replication 4
Before application field population																	Total	Dead ACP	Total	Dead ACP	Total	Dead ACP	Total	Dead ACP					Total	Dead ACP	Total	Dead ACP	Total	Dead ACP	Total	Dead ACP
Dose mortality data of Asian citrus psyllid for Dimethoate 4E (ng/μl) (48hour)															Water	0	10	0	10	0	12	0	10	0			Water	0	10	0	10	0	11	0	10	0
Insecticide	Concentration	Replication 1		Replication 2		Replication 3		Replication 4		Replication 5					Dimethoate	0.001	9	0	10	1	10	0	10	0			Dimethoate	0.001	10	0	10	1	10	0	11	0
		Total	Dead ACP	Total	Dead ACP	Total	Dead ACP	Total	Dead ACP	Total	Dead ACP				Dimethoate	0.01	10	2	10	1	10	1	10	1			Dimethoate	0.01	8	0	11	1	10	2	11	0
Water	0	10	0	10	0	10	0	10	0	10	0				Dimethoate	0.1	10	2	8	0	10	0	10	1			Dimethoate	0.1	8	1	10	2	10	1	10	1
Dimethoate	0.01	10	0	10	0	10	1	10	1	10	1				Dimethoate	1	10	2	9	9	10	8	10	9			Dimethoate	1	9	3	10	1	10	1	10	1
Dimethoate	0.1	10	2	10	3	10	4	10	2	10	4				Dimethoate	10	10	8	10	10	10	10	10	10			Dimethoate	10	10	6	10	2	10	2	12	3
Dimethoate	1	10	6	10	6	10	5	10	5	10	8				Dimethoate	100	11	10	10	10	12	12	12	12			Dimethoate	100	10	10	10	10	12	7	10	9
Dimethoate	10	10	10	10	10	10	10	10	10	10	10
Dimethoate	100	10	10	10	10	10	10	10	10	10	10													C
															Insecticide	Concentration	Replication 1		Replication 2		Replication 3		Replication 4
																	Total	Dead ACP	Total	Dead ACP	Total	Dead ACP	Total	Dead ACP
															Water	0	10	0	10	0	10	0	10	0
															Dimethoate	0.001	10	0	10	1	10	0	10	0
															Dimethoate	0.01	10	2	10	1	10	0	10	0
															Dimethoate	0.1	8	1	9	1	10	1	10	1
															Dimethoate	1	11	2	8	2	10	3	10	4
															Dimethoate	10	8	7	10	8	10	9	10	9
															Dimethoate	100	10	10	10	10	12	12	11	11

## Sheet: Table 8
Probit regression for Diaphorina citri adults exposed to imidacloprid from field plots under different insecticide treatment rotations
Before application laboratory population
Dose mortality data of Asian citrus psyllid for Admire Pro 4.6F (ng/μl)																							A
Insecticide	Concentration	Replication 1		Replication 2		Replication 3		Replication 4		Replication 5				Dose mortality data of Asian citrus psyllid for Admire 4E (ng/μl) (48hour)																					UT
		Total	Dead ACP	Total	Dead ACP	Total	Dead ACP	Total	Dead ACP	Total	Dead ACP			Insecticide	Concentration	Replication 1		Replication 2		Replication 3		Replication 4				Inseticide	Concentration	Replication 1		Replication 2		Replication 3		Replication 4
Water	0	5	0	5	0	5	0	5	0	5	0					Total	Dead ACP	Total	Dead ACP	Total	Dead ACP	Total	Dead ACP					Total	Dead ACP	Total	Dead ACP	Total	Dead ACP	Total	Dead ACP
Admire	0.01	5	0	5	2	5	2	5	1	5	1			Water	0	10	0	10	0	10	0	10	0			Water	0	10	0	10	0	10	0	10	0
Admire	0.1	5	2	5	1	5	2	5	2	5	2			Admire	0.001	10	0	10	1	10	1	10	1			Admire	0.001	10	0	10	1	10	2	10	1
Admire	1	5	2	5	2	5	2	5	2	5	2			Admire	0.01	10	1	10	1	10	2	10	2			Admire	0.01	10	1	10	1	10	1	10	1
Admire	10	5	5	5	4	5	4	5	4	5	4			Admire	0.1	10	2	10	3	10	2	10	3			Admire	0.1	10	3	10	2	10	3	10	3
Admire	100	5	5	5	5	5	5	5	5	5	5			Admire	1	10	5	10	5	10	5	10	6			Admire	1	10	5	10	6	10	6	10	6
Admire	1000	5	5	5	5	5	5	5	5	5	5			Admire	10	10	6	10	6	10	6	10	7			Admire	10	10	6	10	7	10	7	10	7
														Admire	100	10	7	10	7	10	8	10	8			Admire	100	10	9	10	9	10	9	10	9
																							B												T
Insecticide	Concentration	Replication 1		Replication 2		Replication 3		Replication 4		Replication 5				Insecticide	Concentration	Replication 1		Replication 2		Replication 3		Replication 4				Inseticide	Concentration	Replication 1		Replication 2		Replication 3		Replication 4
		Total	Dead ACP	Total	Dead ACP	Total	Dead ACP	Total	Dead ACP	Total	Dead ACP					Total	Dead ACP	Total	Dead ACP	Total	Dead ACP	Total	Dead ACP					Total	Dead ACP	Total	Dead ACP	Total	Dead ACP	Total	Dead ACP
Water	0	5	0	5	0	5	0	5	0	5	0			Water	0	10	0	10	0	10	0	10	0			Water	0	10	0	10	0	10	0	10	1
Admire	0.01	5	1	5	1	5	1	5	1	5	1			Admire	0.001	10	0	10	1	10	1	10	1			Admire	0.001	10	0	10	1	10	1	10	1
Admire	0.1	5	2	5	2	5	2	5	2	5	2			Admire	0.01	10	1	10	1	10	1	10	2			Admire	0.01	10	1	10	2	10	2	10	2
Admire	1	5	3	5	3	5	2	5	3	5	3			Admire	0.1	10	2	10	3	10	3	10	3			Admire	0.1	10	3	10	2	10	2	10	2
Admire	10	5	4	5	4	5	4	5	4	5	4			Admire	1	10	5	10	6	10	6	10	7			Admire	1	10	4	10	5	10	5	10	6
Admire	100	5	5	5	5	5	5	5	5	5	5			Admire	10	10	7	10	7	10	7	10	7			Admire	10	10	5	10	6	10	6	10	7
Admire	1000	5	5	5	5	5	5	5	5	5	5			Dimethoate	100	10	9	11	10	10	9	10	9			Admire	100	10	7	10	8	10	9	10	9
																							C
														Insecticide	Concentration	Replication 1		Replication 2		Replication 3		Replication 4
Before application field population																Total	Dead ACP	Total	Dead ACP	Total	Dead ACP	Total	Dead ACP
Dose mortality data of Asian citrus psyllid for Admire Pro 4.6F (ng/μl)														Water	0	10	0	10	0	10	0	10	0
Insecticide	Concentration	Replication 1		Replication 2		Replication 3		Replication 4		Replication 5				Admire	0.001	10	0	10	1	10	0	10	0
		Total	Dead ACP	Total	Dead ACP	Total	Dead ACP	Total	Dead ACP	Total	Dead ACP			Admire	0.01	10	1	10	1	10	1	10	1
Water	0	5	0	5	0	5	0	5	0	5	0			Admire	0.1	10	3	10	3	10	3	10	4
Admire	0.01	5	1	5	1	5	1	5	1	5	1			Admire	1	10	5	10	6	10	5	10	5
Admire	0.1	5	1	5	1	5	1	5	2	5	2			Admire	10	10	7	10	7	10	7	10	7
Admire	1	5	3	5	3	5	2	5	2	5	3			Admire	100	10	9	10	8	10	8	10	8
Admire	10	5	5	5	4	5	3	5	3	5	4
Admire	100	5	5	5	5	5	4	5	5	5	5
Inseticide	Concentration	Replication 1		Replication 2		Replication 3		Replication 4		Replication 5
		Total	Dead ACP	Total	Dead ACP	Total	Dead ACP	Total	Dead ACP	Total	Dead ACP
Water	0	5	0	5	0	5	0	5	0	5	0
Admire	0.01	5	2	5	2	5	1	5	1	5	1
Admire	0.1	5	1	5	1	5	1	5	1	5	2
Admire	1	5	1	5	2	5	2	5	2	5	2
Admire	10	5	3	5	3	5	3	5	3	5	3
Admire	100	5	5	5	5	5	4	5	5	5	5
